1 **Title:**

2 **Ancient genomes redate the extinction of *Sussemionus*, a subgenus of**  
3 ***Equus*, to late Holocene**

4

5 Dawei Cai<sup>1,†,\*</sup>, Siqi Zhu<sup>1,†</sup>, Mian Gong<sup>2,†</sup>, Naifan Zhang<sup>1</sup>, Jia Wen<sup>2</sup>, Qiyao Liang<sup>1</sup>,  
6 Weilu Sun<sup>1</sup>, Xinyue Shao<sup>1</sup>, Yaqi Guo<sup>1</sup>, Yudong Cai<sup>2</sup>, Zhuqing Zheng<sup>2</sup>, Wei Zhang<sup>3</sup>,  
7 Songmei Hu<sup>4</sup>, Xiaoyang Wang<sup>5</sup>, He Tian<sup>3</sup>, Youqian Li<sup>3</sup>, Wei Liu<sup>3</sup>, Miaomiao Yang<sup>4</sup>,  
8 Jian Yang<sup>5</sup>, Duo Wu<sup>6</sup>, Ludovic Orlando<sup>7,\*</sup>, and Yu Jiang<sup>b,\*</sup>

9

10 <sup>1</sup>Research Center for Chinese Frontier Archaeology, Jilin University, Changchun,  
11 130012, China.

12 <sup>2</sup>Key Laboratory of Animal Genetics, Breeding and Reproduction of Shaanxi Province,  
13 College of Animal Science and Technology, Northwest A&F University, Yangling,  
14 712100, China.

15 <sup>3</sup>Heilongjiang Provincial Institute of Cultural Relics and Archaeology, Harbin, 150008,  
16 China.

17 <sup>4</sup>Shaanxi Provincial Institute of Archaeology, Xi'an, 710054, China.

18 <sup>5</sup>Ningxia Institute of Cultural Relics and Archaeology, Yinchuan, 750001, China.

19 <sup>6</sup>College of Earth and Environmental Sciences; MOE Key Laboratory of Western  
20 China's Environmental Systems, Lanzhou University, Lanzhou 730000, China.

21 <sup>7</sup>Centre d'Anthropobiologie et de Génomique de Toulouse (CAGT), CNRS UMR

22 5288, Université de Toulouse, Université Paul Sabatier, Toulouse, France.

23 †D.C., S.Z., and M.G. contributed equally to this work.

24 \*For correspondence: [caidw@jlu.edu.cn](mailto:caidw@jlu.edu.cn); [ludovic.orlando@univ-tlse3.fr](mailto:ludovic.orlando@univ-tlse3.fr);

25 [yu.jiang@nwafu.edu.cn](mailto:yu.jiang@nwafu.edu.cn).

26

27

## 28 **Abstract**

29 The exceptionally-rich fossil record available for the equid family has provided  
30 textbook examples of macroevolutionary changes. Horses, asses and zebras represent  
31 three extant subgenus of *Equus* lineage, while the *Sussemionus* subgenus is another  
32 remarkable *Equus* lineage ranging from North America to Ethiopia in Pleistocene. We  
33 sequenced 26 archaeological specimens from northern China in Holocene showing  
34 morphological features reminiscent of *Equus ovodovi*, a species representative of  
35 *Sussemionus*, and further confirmed them as this species by genetic analyses. Thus,  
36 we present the first high-quality complete genome of the *Sussemionus* that we  
37 sequenced to 12.0× depth-of-coverage and demonstrate that it survived until ~3,500  
38 years ago, despite the continued demographic collapse during the Last Glacial  
39 Maximum and the great human expansion in East Asia. We also confirmed the *Equus*  
40 phylogenetic tree, and found *Sussemionus* diverged from the ancestor of non-caballine  
41 equids ~2.3-2.7 Million years ago and admixture events could have taken place  
42 between them. Our works suggest the small genetic diversity but not the enhanced

43 inbreeding mainly limited the chances of survival of the species, and illustrates how  
44 ancient DNA can inform on extinction dynamics and the long-term resilience of  
45 species surviving in cryptic population pockets.

46

## 47 **Introduction**

48 Today, all of the seven extant species forming the horse family belong to one single  
49 genus, *Equus*. It emerged in North America some 4.0-4.5 million years ago (L.  
50 Orlando et al., 2013), and first spread to Eurasia ~2.6 million years ago, via the  
51 Beringia land bridge (Lindsay, Opdyke, & Johnson, 1980). This first vicariance and  
52 expansion out-of-America led to the emergence of the ancestors of zebras, hemionus  
53 and donkeys, a group collectively known as non-caballine equids. Another expansion  
54 through Beringia occurred later, bringing caballine equids (i.e. those most closely  
55 related to the horse) into the Old-World, where they survived until their domestication  
56 some ~5,500 years ago (Gaunitz et al., 2018; Outram et al., 2009).

57 In the recent years, ancient DNA (aDNA) data have revealed that the genetic  
58 diversity of non-caballine *Equus* was considerably larger diversity in the past than it is  
59 today (Librado & Orlando, 2020; Ludovic Orlando, 2020), especially as the first  
60 mitochondrial DNA (mtDNA) data of *Equus* (*Sussemionus*) specimens were collected  
61 (hereafter referred to as Sussemiones) (Eisenmann, 2010). This lineage radiated  
62 across North America, Africa, and Siberia, and developed multiple adaptations to a  
63 whole range of arid and humid environments (Eisenmann, 2010). Sussemiones was  
64 first believed to have become extinct during the Middle Pleistocene as the last known

65 specimen showing typical morpho-anatomy dated back to approximately 500,000  
66 years ago (Vasiliev, 2013). However, DNA results obtained on multiple osseous  
67 remains within the radiocarbon range and showing morphological traits reminiscent of  
68 the Eurasian *Sussemiones* species indicated that the lineage in fact survived until the  
69 Late Pleistocene (Druzhkova et al., 2017; L. Orlando et al., 2009; Vilstrup et al., 2013;  
70 Yuan et al., 2019). Pioneering publications indicated survival dates 40-50 kya in  
71 southeastern Siberia, Russia (Proskuryakova cave) (L. Orlando et al., 2009; Vilstrup  
72 et al., 2013), ~32 kya at the Denisova cave (Druzhkova et al., 2017), and ~12.6 kya at  
73 northeastern China (Yuan et al., 2019).

74 Despite an abundant fossil material, only a limited number of *Sussemiones*  
75 specimens have been investigated for Ancient mitochondrial DNA (aDNA), which  
76 showed that *Sussemiones* formed a non-caballine equine lineage. However, the exact  
77 placement of *Sussemiones* could not be resolved (Heintzman et al., 2017; L. Orlando  
78 et al., 2009; Vilstrup et al., 2013). In this study, we have carried out archaeological  
79 excavations in three Holocene sites in China, and uncovered equine samples showing  
80 distinct morphological features when compared to horses and donkeys (Figure  
81 1—figure supplement 1). The whole mitochondrial and nuclear genome data allowed  
82 us to unveil the phylogenetic placement of *Sussemiones* within the *Equus*  
83 evolutionary tree, the timing of its divergence to other non-caballine equids,  
84 signatures of demographic collapse and adaptations specific to this lineage, and the  
85 extinction dynamics of this lineage.

86

## 87 **Results**

### 88 **Archaeological samples and sequencing data**

89 All the equine specimens investigated in this study were excavated from three  
90 archaeological sites in China (Figure 1 and Table S1) (Honghe, Heilongjiang Province  
91 (Figure 1—figure supplement 2); Muzhuzhuliang, Shaanxi Province; Shatangbeiyuan,  
92 Ningxia Province). They showed morphological and genetic signatures distinct from  
93 those of extant horses and donkeys. The morphological differences were especially  
94 marked in the second and third molars, which appeared to be smaller than in modern  
95 horses, and were reminiscent of the third molars paracones and metacones observed in  
96 *Sussemionex* specimens (Figure 1B). Combined, these samples were radiocarbon  
97 dated to 3,477-4,481 calibrated years before the present (cal BP), including the latest  
98 sample HH13H with 3,477-3,637 cal BP (Table S2). They could, thus, represent some  
99 of the latest surviving *Sussemionex* individuals prior to their extinction.

100 We next aimed at genetically characterizing and identifying the taxonomic status  
101 of these specimens using high-throughput DNA sequencing technologies. We  
102 extracted ancient DNA from a total of 26 specimens and sequenced the whole nuclear  
103 genome at ~0.002 to 12.0 times coverage, including three samples from Honghe  
104 provided 12.0×, 3.5× and 1.0× nuclear genome (Table S1). Comparison of the X  
105 chromosome and autosomal coverage revealed the presence of 15 males and 11  
106 females.

107

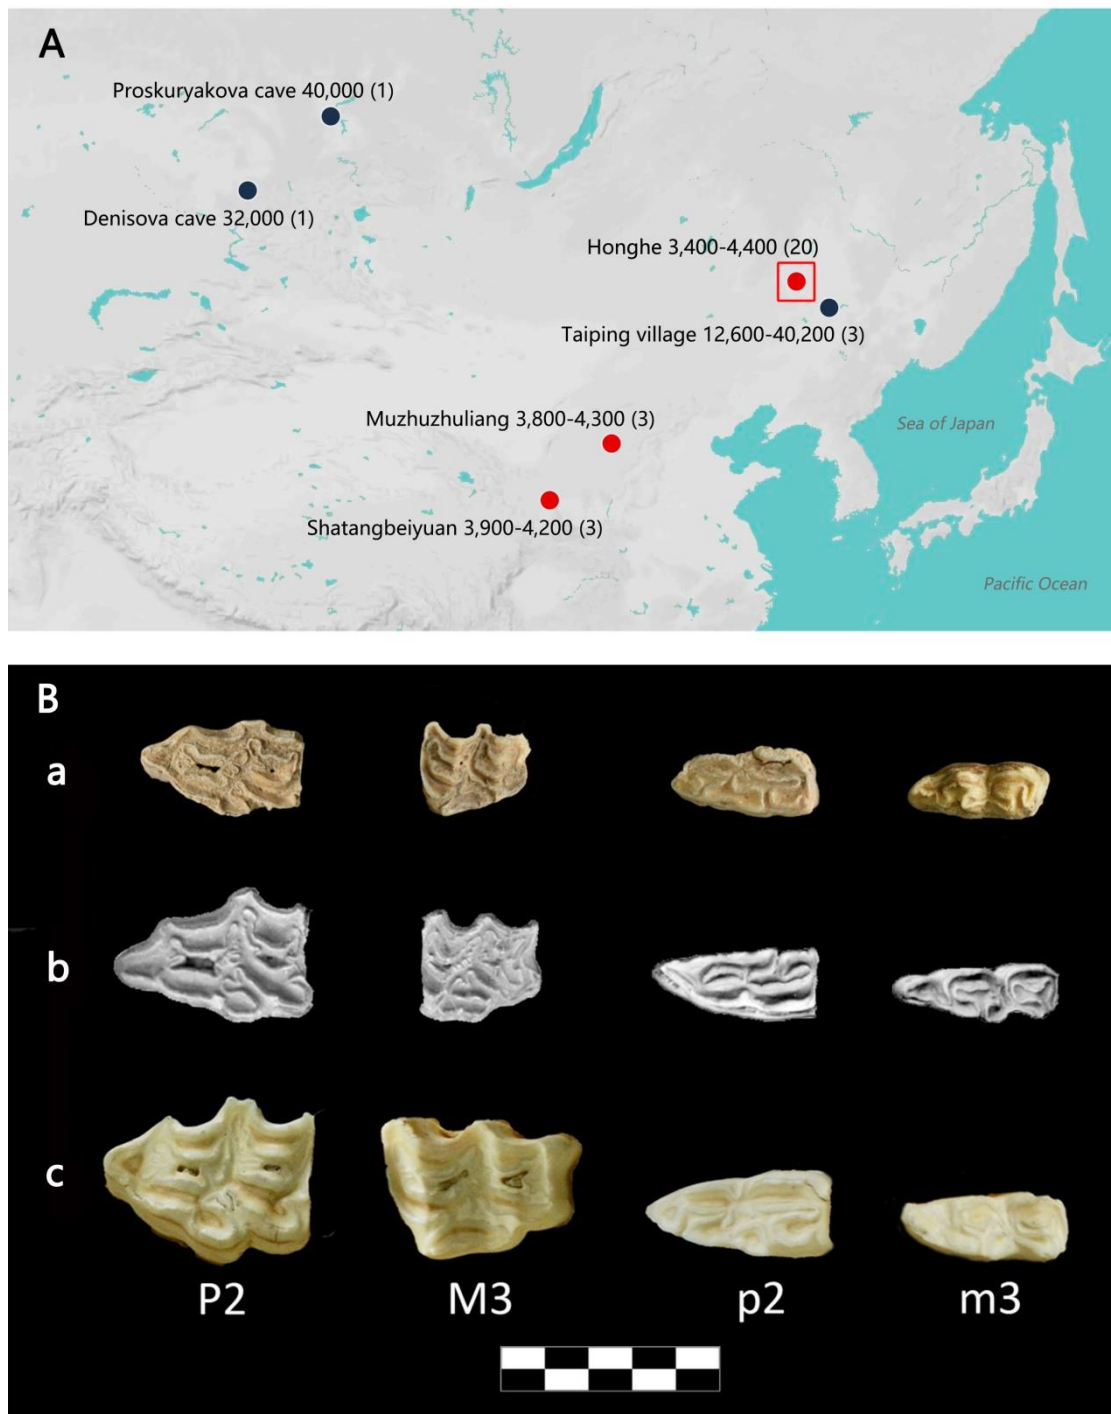

108

109 **Figure 1.** Sampling distribution and archaeological research of *E. (Sussemionus)*

110 *ovodovi*. (A) *E. (Sussemionus) ovodovi* geographic range. The three red circles

111 indicate the archaeological sites analyzed in this study. The site (Honghe) that

112 delivered the complete genome sequence at 12.0-fold average depth-of-coverage

113 (HH06D) is highlighted with a square. The black circles indicate sites that provided  
114 complete mitochondrial genome sequences in previous studies (Druzhkova et al.,  
115 2017; L. Orlando et al., 2009; Vilstrup et al., 2013; Yuan et al., 2019). The temporal  
116 range covered by the different samples analyzed is given in years before present (YBP)  
117 and follows the name of each site. Numbers between parentheses indicate the number  
118 of samples for which DNA sequence data could be generated. **(B)** *Facies masticatoria*  
119 *dentis* of P2, M3, p2 and m3 for the *E. (Sussemionus) ovodovi* samples of the Honghe  
120 site analyzed here (a), *E. Sussemionus* (b), and *E. caballus* (c). Teeth from the right  
121 side are shown, except for *E. Sussemionus*. The erupted teeth of the samples of the  
122 Honghe site appear to be smaller than those of the *E. Sussemionus* specimen.

123 The following figure supplements are available for figure 1:

124 **Figure supplement 1.** Archaeological material investigated in this study.

125 **Figure supplement 2.** Aerial view of the Honghe site.

126

## 127 **Taxonomic status**

128 To assess whether the sequenced specimens belonged to the same taxonomic group or  
129 comprised different species, we carried out a Principle Component Analysis (PCA)  
130 including all the equine species sequenced at the genome level (depth of coverage  $\geq$   
131  $1\times$ ) (Figure 2A and Figure 2—figure supplements 3 and 4). For this, we downloaded  
132 11 previously-published equine genomes representing all extant species of equids and  
133 the extinct quagga zebra (Huang et al., 2015; Jonsson et al., 2014; Kalbfleisch et al.,  
134 2018; L. Orlando et al., 2013; Renaud et al., 2018) (Table S3). All the Chinese

135 specimens analyzed in this study were found to cluster together along the first two  
136 PCA components, in a group that was distinct from all other equine species (Figure  
137 2A and Figure 2—figure supplement 3) but closer to non-caballine equine species  
138 than to the horse (Figure 2A). This suggested that they were all members of a unique  
139 taxonomic group, most related to non-caballine equids.

140 Maximum likelihood (ML) phylogenetic analyses including the nearly-complete 17  
141 mitochondrial genomes reported in this study (Table S1, depth of coverage no less  
142 than  $1\times$ ) confirmed their clustering with non-caballine equids, within a single  
143 monophyletic group that also included five previously-characterized Sussemiones  
144 specimens (Figure 2B and Figure 2—figure supplements 5 and 6). This grouping was  
145 supported with maximal (100%) bootstrap support. This, and the PCA clustering,  
146 indicated that the different excavation sites investigated in this study in fact all  
147 provided specimens that belonged to the *E. (Sussemionus) ovodovi* species.

148 We also inferred maternal lineages of *E. ovodovi* using complete mitogenomes.  
149 Phylogenetic analyses showed that the species were mainly divided into two major  
150 haplogroups (A and B), of which most of the specimens were characterised by the  
151 haplogroup B, including all previously reported sequences, whereas 2 Muzhuzhuliang  
152 and 3 Honghe individuals belonged to the new haplogroup A (Figure 2B). Further  
153 distinction could also be carried out in the two haplogroups (Figure 2B).

154 To further assess phylogenetic affinities, we used the two genomes characterized to  
155 at least  $3\times$  average depth-of-coverage (HH04D and HH06D) to replace Sussemiones  
156 within the equine phylogenetic tree. To achieve this, we used ML phylogenetic



157 reconstruction and an alignment of the coding sequences of the protein coding genes  
158 ( Figure 2C and Figure 2—figure supplement 7A). This showed that the Chinese  
159 ancient specimens branched off before the radiation leading to modern asses and  
160 zebras (Figure 2C). Similar tree topologies were recovered using whole-genome SNPs  
161 by TreeMix (Pickrell & Pritchard, 2012) (Figure 2—figure supplements 8 and 9).  
162 Combined with the analysis of the occlusal surface of the molars, in particular the  
163 absence of the caballine notch, the shape of metacones and protocones, and the  
164 reduced tooth size (Figure 1B), our analyses allowed us to conclude that the material  
165 analyzed represented small specimens of the extinct *Equus (Sussemionus) ovodovi*.  
166 This lineage, thus, survived in China during the Holocene, and until cal 3,477-4,481  
167 cal BP, which is approximately ~8,300-9,300 years after the latest known specimen to  
168 date (Druzhkova et al., 2017; L. Orlando et al., 2009; Vilstrup et al., 2013; Yuan et al.,  
169 2019).  
170

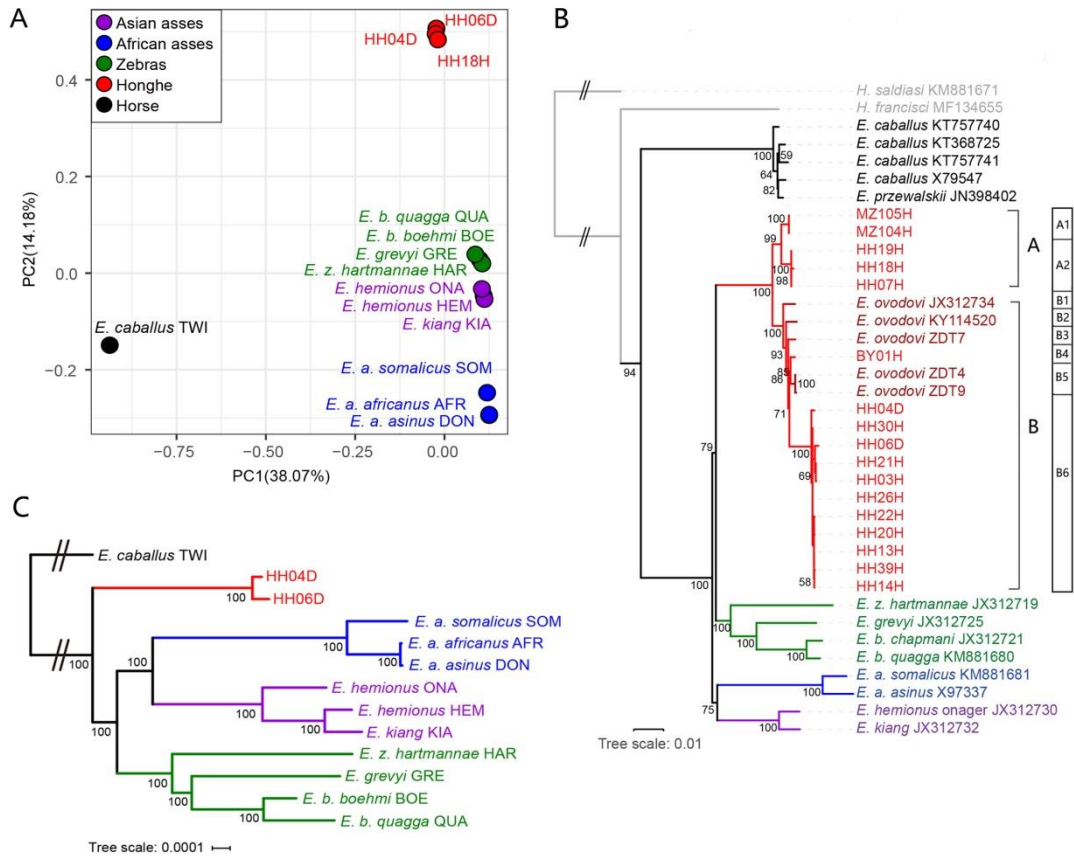

171

172 **Figure 2.** Genetic relationships within the *Equus* genus. Honghe (HH),

173 Muzhuzhuliang (MZ) and Shatangbei yuan (BY) specimens are shown in red, while

174 Asian asses, African asses, zebras and horses are shown in whereas purple, blue, green

175 and black, respectively. (A) PCA based on genotype likelihoods, including horses and

176 all other extant non-caballine lineages (16,293,825 bp, excluding transitions). Only

177 specimens whose genomes were sequenced at least to 1.0× average depth-of-coverage

178 are included. (B) Maximum likelihood tree based on 5 mitochondrial partitions

179 (representing a total of 15,399 bp). Previously published *E. ovodovi* sequences are

180 shown in deep red. The tree was rooted using *Hippidion saldiasi* and *Haringtonhippus*

181 *francisci* as outgroups (not shown). Node supports were estimated from 1,000

182 bootstrap pseudo-replicates and are displayed only if greater than 50%. The black line

183 indicates the mitochondrial haplogroup A and B. (C) Maximum likelihood tree based  
184 on sequences of 19,650 protein-coding genes with specimens sequenced at least  $3.0\times$   
185 average coverage (representing 32,756,854 bp).

186 The following figure supplements are available for figure 2:

187 **Figure supplement 1.** DNA Damage patterns for HH06D.

188 **Figure supplement 2.** Error profiles of the 26 ancient genomes characterized in this  
189 study.

190 **Figure supplement 3.** Principal Component Analysis (PCA) based on genotype  
191 likelihoods using the horse reference genome.

192 **Figure supplement 4.** Principal Component Analysis (PCA) based on genotype  
193 likelihoods using the donkey reference genome.

194 **Figure supplement 5.** RAxML-NG (GTR+GAMMA model) Maximum Likelihood  
195 phylogeny of complete mitochondrial sequence data.

196 **Figure supplement 6.** Bayesian mitochondrial phylogeny based on 6 partitions and  
197 using *Hippidion Saldiasi* as outgroup.

198 **Figure supplement 7.** Exome-based Maximum likelihood phylogeny rooted by the  
199 horse lineage.

200 **Figure supplement 8.** Treemix analysis of based on genome-wide SNP data  
201 conditioned on transversions using the horse reference genome.

202 **Figure supplement 9.** Treemix analysis of based on genome-wide SNP data  
203 conditioned on transversions using the donkey reference genome.

204

## 205 **Interspecies admixture and demographic modeling**

206 Bifurcating trees fail to capture possible admixture events between lineages. Yet,  
207 previous research has unveiled pervasive admixture within equids, even amongst  
208 extant equids showing different chromosomal numbers (Jonsson et al., 2014). We thus  
209 next assessed whether the genomic data showed evidence for gene flow between  
210 Sussemiones and other non-caballine equids. To achieve this, we first applied  
211 D-statistics (Soraggi, Wiuf, & Albrechtsen, 2018) to the genome sequence underlying  
212 26 individual genomes and detected that *E. ovodovi* shared an excess of derived  
213 polymorphisms with asses than relative to zebras (Figure 3—figure supplements 1 and  
214 2). This suggested that at least one admixture event could have taken place between  
215 Sussemiones and the ancestor of asses after their divergence from zebras.

216 We next leveraged the ancient genome characterized to high depth-of-coverage  
217 (HH06D) to reconstruct the equine demographic history using G-PhoCS (Gronau,  
218 Hubisz, Gulko, Danko, & Siepel, 2011). More specifically, we first selected members  
219 of each equine lineage representing a total number of 10 genomes, and assumed that  
220 the genus *Equus* emerged some 4.0-4.5 Mya, following previous estimates (L.  
221 Orlando et al., 2013). G-PhoCS analysis confirmed previous analyses indicating that  
222 the zebras and asses lineages diverged ~2.0 Mya and that the deepest divergence within  
223 zebras and asses took place prior to ~1.5 Mya (Jonsson et al., 2014) (Figure 3). It  
224 revealed that the Sussemiones lineage diverged from the ancestor of extant  
225 non-caballine equids ~2.3-2.7 Mya, in line with the fossil record (Eisenmann, 2010).  
226 Allowing for migrations provided support for gene flow between Sussemiones and the

227 ancestor of asses and zebras (Figure 3). However, weak to no migrations were  
228 detected between Sussemiones and extant equids (Table S6). Importantly, the  
229 admixture between Sussemiones and the ancestor of asses seems to have been  
230 stronger than that between Sussemiones and the ancestor of zebras, in line with the  
231 results of D-statistics. G-PhoCS also supported the presence of significant  
232 unidirectional gene-flow prior to ~2.3-2.7 Mya, from the horse branch into the  
233 ancestral branch to all non-caballine equids, including Sussemiones (total migration  
234 rate 2.2-9.2%, Table S7). This is consistent with previous HMMCoal analyses applied  
235 to whole genome sequences of all extant equine species, which indicated significant  
236 gene-flow between the deepest branches of the *Equus* phylogenetic tree until 3.4 Mya,  
237 mostly from a caballine lineage into the ancestor of all non-caballine equids (Jonsson  
238 et al., 2014).  
239

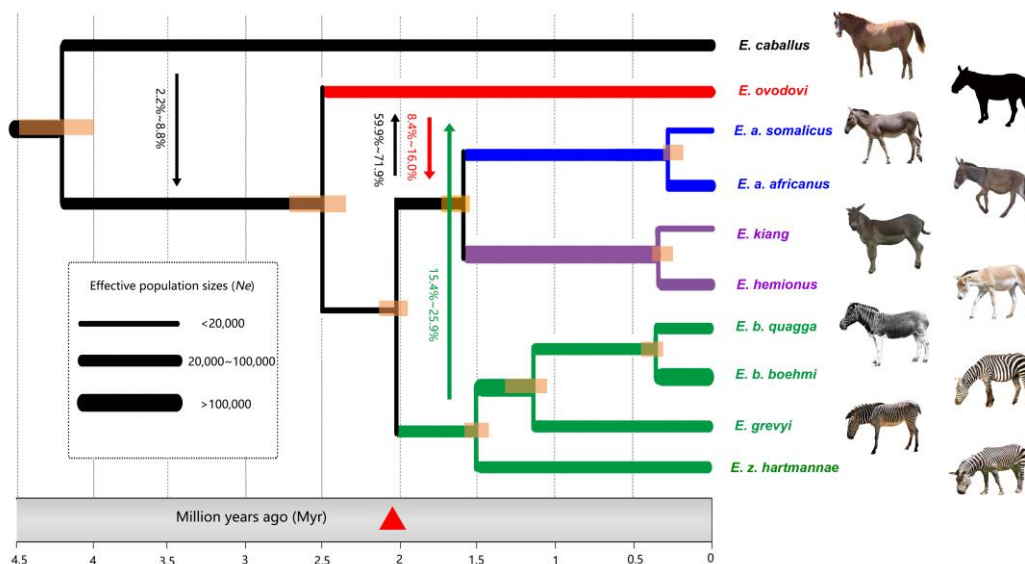

240  
241 **Figure 3.** Demographic model for extinct and extant equine lineages as inferred by  
242 G-PhoCS (Gronau et al., 2011). Node bars represent 95% confidence intervals. The

243 width of each branch is scaled with respect to effective population sizes ( $N_e$ ).

244 Independent  $N_e$  values were estimated for each individual branch of the tree, assuming

245 constant effective sizes through time. Migration bands and probabilities of migration

246 (transformed from total migration rates) are indicated with solid. The red triangle

247 indicates the earliest *Sussemionus* evidence found in the fossil record. (Images: *E.*

248 *caballus* by Infomastern, *E. a. somalicus* by cuatrok77, *E. kiang* by Dunnock\_D, *E. a.*

249 *africanus* by jay galvin, *E. hemionus* by Cloudtail the Snow Leopard, *E. z.*

250 *hartmannae* by calestyo, *E. b. quagga* by Internet Archive Book Images, *E. b. boehmi*

251 by GRIDArendal, and *E. grevyi* by 5of7.)

252 The following figure supplements are available for figure 3:

253 **Figure supplement 1.** *D*-statistics in the form of (zebra, ass; *E. ovodovi*, outgroup),

254 using sequence alignments against the horse reference genome.

255 **Figure supplement 2.** *D*-statistics in the form of (zebra, ass; *E. ovodovi*, outgroup),

256 using sequence alignments against the donkey reference genome.

257 **Figure supplement 3.** NJ tree of selected samples based on 15,324 candidate ‘neutral’

258 loci identified using sequence alignments against the horse reference genome.

259

## 260 **Dynamic demographic profiles, heterozygosity and inbreeding levels**

261 We next leveraged the high-coverage *Sussemiones* genome characterized here to

262 explore further the demographic dynamics of this lineage until its extinction. When

263 modeled as constant through time, population sizes in G-PhoCS indicated that most

264 lineages, including *Sussemiones*, consisted of small populations, excepting the

265 Burchell's zebra (Table S8). Pairwise Sequential Markovian Coalescent (PSMC)  
266 analyses, however, provided us evidence for population size variation through time.  
267 First, the Sussemiones demographic trajectory was found to diverge from that of other  
268 non-caballine equids (specifically, *E. hemionus*) after ~2.0 Mya, confirming the  
269 divergence date estimate retrieved by G-PhoCS (Table S8). Second, we found that the  
270 Sussemiones demographic trajectory constantly increased during the last million year  
271 but stay at a level which was lower than that of other lineages for a long time, until it  
272 reached a peak between 74-84 kya. It was, then, followed by an approximately  
273 45-fold collapse until 13 kya (Figure 4). The Sussemiones population size  
274 experienced a 1.86-fold collapse between 35-42 kya, which is almost coincident with  
275 the timing of the great human expansion to Eurasia (ie. 35-45 kya, (Henn,  
276 Cavalli-Sforza, & Feldman, 2012)). The lineage maintained extremely reduced  
277 population sizes through the Last Glacial Maximal (LGM, 19-26 kya) (Clark et al.,  
278 2009) and the Holocene, until it finally became extinct.

279 Importantly, the sample sequenced to sufficient coverage (HH06D) showed  
280 minimal heterozygosity and moderate inbreeding levels identified by the fraction of  
281 the segments within ROH (Figure 5). Strikingly, this is true in spite of the increased  
282 sequencing error rates of this genome, which likely inflate our estimates. The limited  
283 population sizes and genetic diversity but not the enhanced inbreeding may have  
284 limited the chances of survival of the species, ultimately leading to extinction.

285

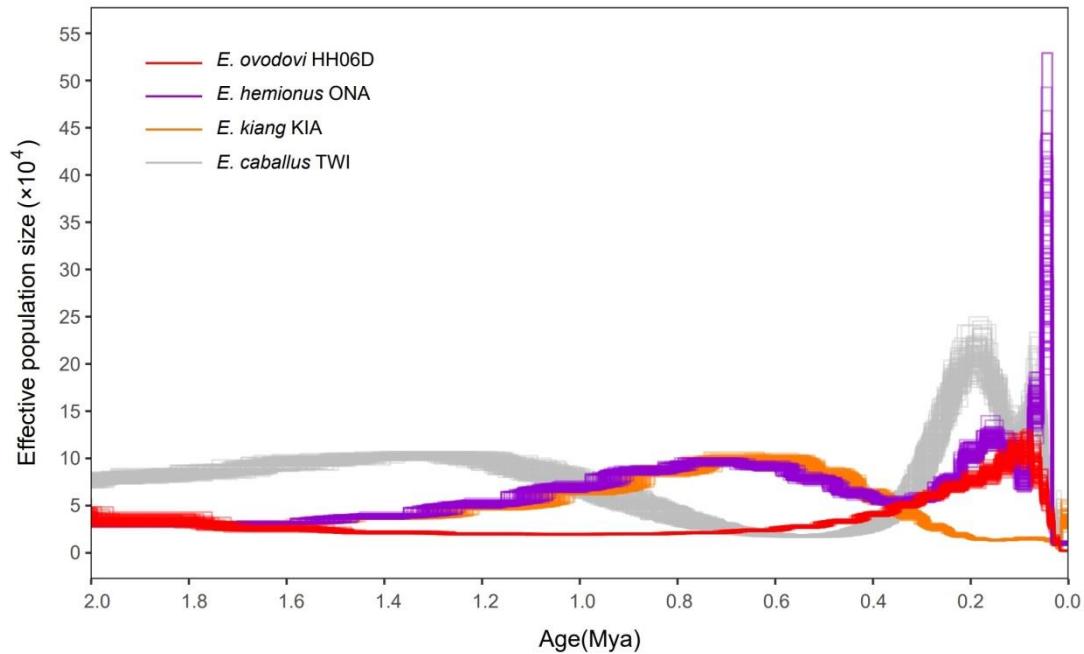

286

287 **Figure 4.** PSMC profiles (100 bootstrap pseudo-replicates) of four Eurasian equine  
288 species (*E. ovodovi* HH06D, *E. caballus* TWI (Kalbfleisch et al., 2018), *E. hemionus*  
289 ONA and *E. kiang* KIA) (Jonsson et al., 2014). The y axis represents effective  
290 population size ( $\times 10,000$ ), and the x axis represents millions of years before present.  
291 Faded lines show bootstrap values.

292 The following figure supplements are available for figure 4:

293 **Figure supplement 1.** PSMC bootstrap pseudo-replicates for samples with and  
294 without transitions.

295 **Figure supplement 2.** Determining the uniform false-negative rate (uFNR) that was  
296 necessary for PSMC scaling.

297



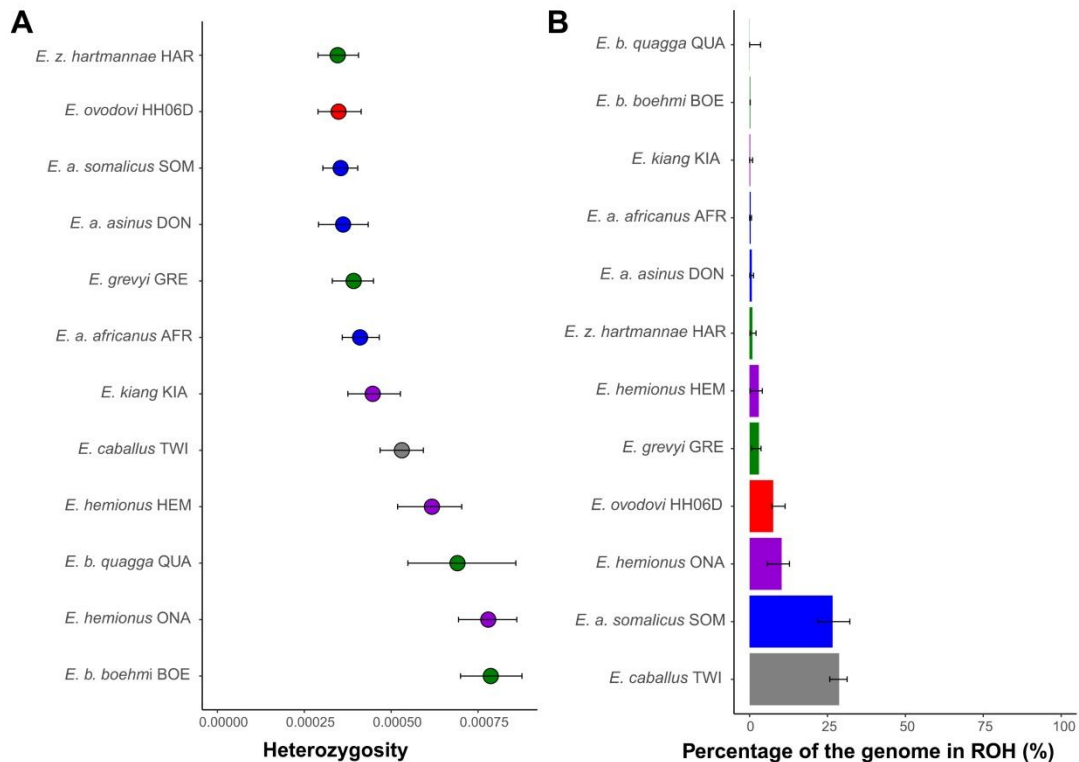

298

299 **Figure 5.** The Heterozygosity and Inbreeding levels of extinct and extant equine

300 lineages. **(A)** Individual heterozygosity outside Runs-of-Homozygosity (ROH). **(B)**

301 Fraction of the genome in ROH. Estimates were obtained excluding transitions and

302 are shown together with their 95% confidence intervals. The colors mirror those from

303 Figure 2.

304 The following figure supplements are available for figure 5:

305 **Figure supplement 1.** Heterozygosity rates outside Runs-of-Homozygosity (ROH)

306 together with 95% confidence intervals.

307 **Figure supplement 2.** The fraction of the genome segments consisting of ROHs

308 together with 95% confidence intervals.

309

310 **Discussion**

311 **Phylogenetic placement of *Equus (Sussemionus) ovodovi***

312 In this study, we have characterized the first nuclear genomes of the now-extinct  
313 equine lineage, *E. (Sussemionus) ovodovi*, the last surviving member of the subgenus  
314 *Equus Sussemionus*. We demonstrated that this lineage survived in China well into the  
315 Holocene with the most recent specimens analyzed dating to ~3,477-3,637 cal BP.  
316 This is almost 9,000 years after the latest specimens previously documented in the  
317 fossil record (Druzhkova et al., 2017; Vilstrup et al., 2013; Yuan et al., 2019). Our  
318 work, thus, shows that *Sussemionus* represents the last currently known *Equus*  
319 subgenus to become extinct. Our work also adds to the list of recently identified  
320 members of the horse family that were still alive at the time horses and donkeys were  
321 first domesticated, some ~5,500 years ago (Fages et al., 2019; Gaunitz et al., 2018;  
322 Rossel et al., 2008). In contrast to those divergent members that were identified in  
323 Siberia and Iberia and both belonged to the horse species (Fages et al., 2019; Schubert,  
324 Jonsson, et al., 2014), *Sussemionus* members were most closely related to  
325 non-caballine equids. This is in agreement with previous studies (Der Sarkissian et al.,  
326 2015; Druzhkova et al., 2017; Heintzman et al., 2017; L. Orlando et al., 2009;  
327 Vilstrup et al., 2013; Yuan et al., 2019), which could, however, not fully resolve the  
328 exact phylogenetic placement of this species within non-caballine clade lineages as  
329 topological tests based on mitochondrial genomes received low confidence support  
330 (Der Sarkissian et al., 2015; Druzhkova et al., 2017; Heintzman et al., 2017; L.  
331 Orlando et al., 2009; Vilstrup et al., 2013; Yuan et al., 2019). Our study solved this  
332 question by reporting the first whole genome phylogeny of *Sussemionus*, which

333 confirmed with maximal bootstrap support this species as a unique basal lineage of  
334 non-caballine equids.

335

### 336 **Suitable habitat and geographic distribution**

337 Previous zooarchaeological and environmental research indicated an ecological range  
338 for *Sussemiones* overlapping with the grasslands located east of the Altay Mountains  
339 and west of the Yenisei River during the Late Pleistocene (Khenzykhenova et al.,  
340 2016; Malikov, 2016; Plasteeva, 2015; Shchetnikov, Klementiev, Filinov, & Semenev,  
341 2015; Shunkov, 2018). Recent research also reported this species in northeastern  
342 China (~12,600-40,200 YBP), where similar climatic and ecological conditions were  
343 found at the time (Yuan et al., 2019). It could, thus, be speculated that *Sussemiones*  
344 was adapted to an environment with moderately dry climatic conditions and steppe  
345 landscapes (Yuan et al., 2019). However, our study identified *Sussemiones* in three  
346 late Holocene sites from China that have mild and humid environmental conditions. In  
347 addition, two distinct mitochondrial haplogroups from 22 individuals have been  
348 defined from the six known sites, suggesting that *Sussemiones* had adapted to  
349 different environmental regions. It also suggests that the species could adapt to a  
350 wider variety of habitats than previously hypothesized, and rejects the contention that  
351 the species became extinct as it could not survive in warmer climatic conditions  
352 (Yuan et al., 2019).

353 Interestingly, the *Sussemiones* specimens identified in this study were excavated  
354 from sites in northeastern China located at almost the same latitude as those

355 Sussemiones localities known so far from Russia, but also at lower latitudes (Figure  
356 1A). This implies that the geographic range of *E. ovodovi* was larger than previously  
357 expected and included at least Northern China and Southern Siberia. In the absence of  
358 identified fossils from Mongolia, whether those two regions were in contact or  
359 separated remains unknown. Further work is necessary to establish whether or not the  
360 species survived in other pockets both within and outside China.

361

### 362 **Demographic history with ancestral interspecific admixture**

363 Our analyses reveal that the divergence between Sussemiones and the most recent  
364 common ancestor of all extant non-caballine equids took place some ~2.3-2.7 Mya,  
365 right before the divergence of zebras and asses. Post-divergence admixture events  
366 with the lineage ancestral to asses and zebras on the one hand, and the lineage  
367 ancestral to all extant zebras, were also identified (Figure 3 and Table S7). Our results,  
368 thus, reveal non-caballine ancestral lineages occupying partly sympatric distributions  
369 that were, consequently, different than those of their descendants, in which zebras are  
370 restricted in Africa and Asian asses in Asia. Whether the admixture events identified  
371 here directly involved the Sussemiones lineage or one (or more) ghost lineage(s)  
372 closely related to Sussemiones requires further research.

373

### 374 **Limited genetic diversity before extinction**

375 The demographic profile of Sussemiones shows that after the peak of population size  
376 culminating some ~74 kya, Sussemiones went through a slow and continuous decline

377 until 13 kya (Figure 4). This time period encompasses several major climate changes  
378 (especially the LGM) and the great human expansion to Eurasia (~35-45 kyr BP)  
379 (Henn et al., 2012). The effective size of *Sussemionus* populations that survived in  
380 Northern China until at least ~3,500 years ago, remained extremely small, as indicated  
381 by their extremely reduced heterozygosity levels compared to other extant and extinct  
382 equine species, although extensive inbreeding was not detected (Figure 5). So  
383 combined with a degree of inbreeding, the reduced genetic diversity available  
384 ultimately resulted in the extinction of the lineage, in a process reminiscent of what  
385 was previously described for the woolly mammoth (Palkopoulou et al., 2015).

386 In conclusion, our study clarifies the phylogenetic placement, speciation timing and  
387 evolutionary history of the now-extinct *Equus Sussemionus* equine subgenus. This  
388 group did not remain in reproductive isolation from other equine lineages, but  
389 contributed to the genetic makeup of the ancestors of present-day Asiatic asses, while  
390 receiving genetic material from the ancestors of African zebras. This supports  
391 geographic distributions at least partly overlapping at the time, thus, not identical to  
392 those observed today. The species demographic trajectory experienced a steady  
393 decline from ~74 kya and during a period witnessing both important climatic changes  
394 and the Great human expansion across Asia (Henn et al., 2012). It survived with  
395 minimal genetic diversity the Pleistocene-Holocene transition, and for at least eight  
396 millennia before it became extinct, which providing insights into the extinction of  
397 large animals since Holocene.

398

399 **Additional information**

400 **Acknowledgments**

401 We thank High-Performance Computing (HPC) of Northwest A&F University  
402 (NWAUFU) for providing computing resources.

403

404 **Funding**

| <b>Funder</b>                                                                                                         | <b>Grant reference number</b> | <b>Author</b>   |
|-----------------------------------------------------------------------------------------------------------------------|-------------------------------|-----------------|
| Major Projects of the<br>National Social Science<br>Foundation of China                                               | 17ZDA221                      | Dawei Cai       |
| European Research<br>Council (ERC) under the<br>European Union's Horizon<br>2020 research and<br>innovation programme | 681605                        | Ludovic Orlando |
| National Natural Science<br>Foundation of China                                                                       | 31822052                      | Yu Jiang        |

The funders had no role in study design, data collection and interpretation, or the decision to submit the work for publication.

405

406 **Additional files**

407 **Supplementary files**

408 • Supplementary file 1. Supplementary tables that support the analysis and results

409 above.

410 • Transparent reporting form

411

## 412 **Materials and Methods**

### 413 **Genome Sequencing**

414 Prior to DNA extraction, the outer surface of the sample was cleaned with a brush.

415 The cleaned sample was subsequently cut into smaller pieces and soaked in 10%

416 bleach for 20 min, rinsed with ethanol and distilled water, and then UV-irradiated for

417 30 min on each side. Finally, powder was obtained by drilling with a dental drill

418 (Traus 204, Korea). Ancient DNA was extracted from the sample powder by using a

419 modified silica spin column method (Yang, Eng, Waye, Dudar, & Saunders, 1998) in

420 dedicated ancient DNA facilities at Jilin University (JLU). For each specimen, a total

421 of 200mg powder was added with 3.9ml EDTA (0.465mol/L) and placed in the

422 refrigerator at 4 °C for 12 hours for decalcification, and then 0.1 ml Proteinase K

423 (0.4mg/mL) were added and incubated overnight in a rotating hybridization oven at

424 50°C (220rpm/min). After centrifugation, the supernatant was transferred into an

425 Amicon® Ultra-4 centrifugal filter device (Merck Millipore Ltd, 10000 Nominal

426 Molecular Weight Limit), reduced to less than 100ul, and purified with QIAquick®

427 PCR Purification Kit (QIAGEN), according to the manual instructions.

428 Before preparation of DNA libraries, we first PCR targeted short fragments of the

429 mitochondrial hypervariable region to select those samples positive for the presence

430 of equine DNA (which was further confirmed through Sanger sequencing). For this,  
431 we used the oligonucleotide primers L15473 5' –CTTCCCCTAAACGACAACAA–3'  
432 and reverse primer H15692 5' –TTTGACTTGGATGGGGTATG–3' ; and forward  
433 primer L15571 5' –AATGGCCTATGTACGTCGTG–3' and reverse primer H15772  
434 5' –GGGAGGGTTGCTGATTTC–3' from (Dawei et al., 2007), and the amplification  
435 conditions therein.

436 Double-stranded single-indexed libraries were prepared using NEBNext® Ultra™  
437 II DNA Library Prep Kit for Illumina® (NEB #E7645S) and NEBNext® Multiplex  
438 Oligos for Illumina® Index Primers Set 1 and 2 (NEB #E7335S, #E7500S), following  
439 the manufacturer's instructions with minor modifications. Specifically, the extracted  
440 DNA (50ul) were end repaired and A-tailed by adding 7µl of NEBNext Ultra II End  
441 Prep Reaction Buffer and 3 µl of NEBNext Ultra II End Prep Enzyme Mix, and  
442 incubated for 40 min at 20 °C and then 30 minutes at 65 °C. The adaptor was ligated  
443 to the dA-tailed DNA fragments by adding 30ul of NEBNext Ultra II Ligation Master  
444 Mix, 1ul of NEBNext Ligation Enhancer and 2.5ul of NEBNext Adaptor for Illumina  
445 (Dilution 1:10), and incubated for 20 min at 20 °C. The adaptor was then linearized  
446 by adding 3ul of USER™ Enzyme and performing an incubation for 15 min at 37°C.  
447 The adaptor-ligated DNA were cleaned without size selection using the MinElute®  
448 PCR Purification Kit (QIAGEN, Germany), following the instructions provided by  
449 the manufacturer. PCR enrichment was performed by using 30ul of NEBNext Ultra II  
450 Q5 Master Mix, 1ul of Index Primer, 1ul of Universal PCR Primer and 18ul of  
451 adaptor-ligated DNA. PCR cycling conditions comprised an initial denaturation at



452 98 °C for 30s, 14-16 cycles of 98 °C for 10s, 65 °C for 75s, and a final extension at  
453 65 °C for 5min. PCR amplified DNA libraries were purified using Agencourt AMPure  
454 XP Beads, following the manufacturer's instructions, and Illumina sequencing was  
455 performed on HiSeq X Ten platform using 150bp paired-end reads. Overall, we  
456 sequenced a total of 28 DNA libraries and generated 2,727,843,803 read pairs.

457 All pre-PCR procedures were conducted in a dedicated ancient DNA laboratory at  
458 JLU that is physically separated from the post-PCR laboratory. To remove potential  
459 contaminant DNA, working areas and benches were frequently cleaned with bleach  
460 and UV exposure. Lab experiments were carried out wearing full body suits,  
461 facemasks, and gloves. To detect contamination, mock blank controls were included  
462 in each experimental step, including DNA extraction, DNA library preparation and  
463 PCR setup.

464

## 465 **Data Processing**

466 Sequencing reads were processed and aligned against the horse (EquCab3.0  
467 (Kalbfleisch et al., 2018)) and donkey (Renaud et al., 2018) reference genomes using  
468 the PALEOMIX pipeline (Schubert, Ermini, et al., 2014) with default parameters,  
469 except that we followed the recommendations from (Schubert et al., 2012) and  
470 disabled seeding. Briefly, paired-end (PE) reads longer than 25 nucleotides were  
471 trimmed with AdapterRemoval v2.2 (Schubert, Lindgreen, & Orlando, 2016) and  
472 aligned against the reference genomes using BWA (Li & Durbin, 2009), retaining  
473 alignments with mapping qualities superior to 25. PCR duplicates were then removed

474 using Picard MarkDuplicates (<http://broadinstitute.github.io/picard/>). Finally, all  
475 ancient and modern reads were locally realigned around indels using GATK  
476 (McKenna et al., 2010).

477 Postmortem DNA damage and average sequencing error rates were determined  
478 with mapDamage2.0 (Jonsson, Ginolhac, Schubert, Johnson, & Orlando, 2013)  
479 (Figure 2—figure supplement 1) and ANGSD (Korneliussen, Albrechtsen, & Nielsen,  
480 2014) (Figure 2—figure supplement 2), respectively. Further rescaling and trimming  
481 procedures were implemented following (Gaunitz et al., 2018) to limit the impact of  
482 remnant nucleotide mis-incorporations in subsequent analyses. For each of the DNA  
483 libraries examined, the base composition of the position preceding read starts on the  
484 horse reference genome showed an excess of Guanine and, to a lesser extent, of  
485 Adenine residues (Figure 2—figure supplement 1). This is in line with depurination  
486 driving post-mortem DNA fragmentation (Briggs et al., 2007). Additionally, error rate  
487 estimates for each nucleotide substitution class indicated the predominance of C→T  
488 and G→A mis-incorporations (Figure 2—figure supplement 2). Such  
489 mis-incorporation rates were particularly inflated towards read ends, but not read  
490 starts (Figure 2—figure supplement 1). This is in line with the DNA nucleotide  
491 mis-incorporation profiles expected for the type of DNA library constructed  
492 (Seguin-Orlando et al., 2015), and indicates Cytosine deamination at 5'-overhanging  
493 ends as the most prominent post-mortem DNA degradation reactions (Jonsson et al.,  
494 2013).

495 GATK HaplotypeCaller was used to obtain individual gvcf files with  
496 “--minPruning 1 --minDanglingBranchLength 1” to increase sensitivity. Then we  
497 employed GATK GenotypeGVCFs for genotyping with the option  
498 “--includeNonVariantSites” in order to retain non-variant loci. The vcf files were  
499 further filtered in TreeMix and G-PhoCS analysis.

500

### 501 **Principal component analysis (PCA)**

502 The genotype likelihood framework implemented in ANGSD helped mitigate various  
503 error rates in ancient and modern genomes. Using EquCab3 (Kalbfleisch et al., 2018)  
504 as the reference genome, ANGSD was run using the following options:

505 “-only\_proper\_pairs 1 -uniqueOnly 1 -remove\_bads 1 -minQ 20 -minMapQ 25 -C 50

506 -baq 1 -skipTriallelic 1 -GL 2 -SNP\_pval 1e-6 -rmTrans 1”. This provided a dataset

507 consisting of a total of 16,293,825 transversions when the horse was included, and

508 10,094,431 transversions when the horse was excluded (i.e. when analyses were

509 restricted to non-caballine genomes only). In these analyses, only specimens

510 sequenced to an average depth of coverage  $\geq 1\times$  were retained. Principal Component

511 Analyses were carried out using the PCAngsd package (Meisner & Albrechtsen, 2018)

512 (Figure 2A). To assess the impact of potential reference bias, all analyses were

513 repeated after mapping the sequence data against the donkey reference (Figure

514 2—figure supplement 4).

515

### 516 **Phylogenetic inference**

## 517 **Mitochondrial phylogeny**

518 Cleaned reads were mapped against the mitochondrial genome (Genbank accession no.  
519 NC\_001640), following the same procedure as when mapping against the nuclear  
520 genome. Samples showing an average depth-of-coverage  $<1 \times$  were disregarded,  
521 leaving a total of 17 individuals for further analyses. After removing duplicates,  
522 consensus mitochondrial sequences were generated using ANGSD (-doFasta 2  
523 -doCounts 1 -setMinDepth 3 -uniqueOnly 1 -remove\_bads 1 -minQ 25 -minMapQ 25).  
524 Multiple alignment was performed together with the comparative mtDNA sequences  
525 downloaded from GenBank (Table S4) using MUSCLE v3.8.31 (Edgar, 2004), with  
526 default parameters. The alignments were then split into six partitions (1<sup>st</sup>, 2<sup>nd</sup> and 3<sup>rd</sup>  
527 codon positions, rRNA, tRNA, and control region).

528 Two Maximum Likelihood (ML) trees based on all 6 partitions and excluding the  
529 control region (positions 15,469-16,660 of the horse reference mitochondrial genome)  
530 were both reconstructed using RAxML-NG v.0.9.0 (A. M. Kozlov, Darriba, Flouri,  
531 Morel, & Stamatakis, 2019) with GTR+GAMMA substitution model. A total of 1,000  
532 bootstrap pseudo-replicates were carried out to assess node robustness (Figure  
533 2—figure supplement 5). BEAST 2.5.1.0 (Bouckaert et al., 2019) was used to perform  
534 Bayesian phylogenetic reconstruction and to estimate split times. The six partitions  
535 described above were used, for which the best substitution model was determined  
536 using modelgenerator (version 0.85, (Keane, Creevey, Pentony, Naughton, &  
537 McLnerney, 2006)) and a Bayesian Information Criterion. We applied together with  
538 the Coalescent Constant Population model and a strict LogNormal correlated

539 molecular clock for 50 million generations (sampling frequency = 1 every 1,000).

540 Convergence was assessed visually using Tracer v1.6 and posterior date estimates

541 were retrieved using 10% as burn-in. The final consensus tree was produced using

542 TreeAnnotator 2.5.1.0 (Drummond & Rambaut, 2007) and plotted using ITOL

543 (Letunic & Bork, 2016) (Figure 2—figure supplement 6).

544

### 545 **Autosomal phylogeny**

546 As for autosomes, we reconstructed a (ML) phylogenetic tree as implemented

547 in the PALEOMIX phylo pipeline for phylogenomic reconstructions (Schubert,

548 Ermini, et al., 2014). This analysis was based on the coding sequence (CDS) of

549 protein-coding genes annotated in EquCab3.0, partitioning data according to 1<sup>st</sup>, 2<sup>nd</sup>

550 and 3<sup>rd</sup> codon positions. Maximum Likelihood phylogenetic inference was performed

551 using ExaML v3.0.21 (Alexey M. Kozlov, Aberer, & Stamatakis, 2015) and RAxML

552 v8.2.12 (Stamatakis, 2014), under the GAMMA substitution model with 100 bootstrap

553 pseudo-replicates (Figure 2C and Figure 2—figure supplement 7A). We also repeated

554 the same procedure after mapping against the donkey reference genome and got the

555 same topology (Figure 2—figure supplement 7B).

556 Additionally, we extracted biallelic single nucleotide polymorphisms (SNPs) from

557 the dataset generated in Section 5 using bcftools v1.9 (Li et al., 2009). Both variant

558 datasets obtained following mapping against the horse and donkey reference genomes

559 were used in this analysis to rule out reference bias. We applied filters composed of

560 minimum phred-scaled quality score quality (QUAL) = 20, sites for all individuals

561 below 2 or twice the mean coverage, and allowed up to three individuals with missing  
562 data per site. After disregarding transitions, a total of 18,803,101 (mapping against  
563 horse genome) and 19,459,070 (mapping against donkey genome) transversions were  
564 finally used as input for TreeMix (Pickrell & Pritchard, 2012) with parameters “-k 500  
565 -root TWI”, and considering an increasing number of migrations edges ( $0 \leq m \leq 3$ ;  
566 Figure 2—figure supplements 8 and 9, Table S5).

567

### 568 **Admixture analyses with *D*-statistics**

569 *D*-statistics were calculated to investigate potential introgression between *E. ovodovi*  
570 and other non-caballines (Figure 3—figure supplement 1) using the doAbbababa2  
571 programme in ANGSD (Soraggi et al., 2018). Individuals were grouped by their  
572 respective species. *D*-statistics were computed in the form (((H1, H2), H3), Outgroup)  
573 considering only the autosomal sites from bam files mapping against the horse  
574 reference with the following options: “-minQ 20 -minMapQ 25 -remove\_bads 1  
575 -only\_proper\_pairs 0 -uniqueOnly 1 -baq 1 -C 50”. The horse reference genome was  
576 used as the Outgroup. H1 and H2 denoted any non-caballine genomes except *E.*  
577 *ovodovi* while H3 denoted the *E. ovodovi*. Confidence intervals were estimated  
578 applying a jackknife procedure and 5-Mb windows. *Z*-scores with absolute values  
579 higher than 3 were considered to be statistically significant. To eliminate the bias of  
580 the reference genome, we also rerun the same analysis using sequence alignments  
581 against the donkey reference genome (Figure 3—figure supplement 2).

582

## 583 **G-PhoCS demographic model**

### 584 **Data preparation and filtering**

585 In order to model the equine evolutionary history, we selected a total of 10 individuals  
586 representing each individual lineage and used their high-coverage genomes as input  
587 for G-PhoCS (Gronau et al., 2011). Genotypes were called by GATK and candidate  
588 ‘neutral’ loci were identified by applying the following filters:

589 (1) The simple repeats track available for the reference genome was obtained from  
590 Ensembl v99 release; corresponding regions were masked.

591 (2) All exons of protein-coding genes were discarded together with their 10 kb  
592 flanking regions; this was done based on the GTF format annotation file of the  
593 reference genome available from Ensembl v99 Genome Browser.

594 (3) We identified conserved noncoding elements (CNEs) using phastCons scores  
595 (based on the 20-way Conservation track provided for the mammal clade according to  
596 the genomic coordinates of the human reference) downloaded from the Table Browser  
597 of UCSC. All CNEs and their 100 bp flanking regions were masked, using liftOver to  
598 convert human genome coordinates into EquCab3.0 horse genome coordinates.

599 (4) Exons of noncoding RNA genes together with their one kilobase flanking  
600 regions were removed, based on the annotations available for the reference genome.

601 (5) Gaps in the reference genome were disregarded.

602 Besides the various hard filters described above, regions/sites likely to (1) be  
603 enriched for misaligned bases, and to (2) have high false negative rates during read  
604 alignment or variant detection were masked as missing data. Different individuals

605 may be treated differently depending on the result of genotyping in Section 5  
606 depending on the presence of (1) indels, (2) triallelic sites, (3) positions with depth of  
607 coverage twice the mean depth recorded for each individual, and; (4) transition sites.

608 We selected 1 kb loci located with minimum inter-locus distance of 30 kb from the  
609 intervals that pass all the criteria described above. Then consensus sequences were  
610 generated for each individual from the vcf file generated in Section 5 using bcftools  
611 ‘consensus’ command, with IUPAC codes indicating heterozygous genotypes  
612 (--iupac-codes) and “N” representing masked sites (--mask and --missing ‘N’).

613 Finally, we excluded contiguous intervals if the total amount of missing bases was  
614 greater than 50% of the region length, resulting in a final collection of 15,324 loci  
615 using the horse reference genome (autosomes only). Neighbor-joining trees were  
616 constructed to confirm the topology before the inferring the population divergence  
617 (Figure 3—figure supplement 3).

618

### 619 **MCMC setup**

620 We used default global settings (Gronau et al., 2011), including a Gamma prior  
621 distribution ( $\alpha= 1$ ,  $\beta= 10,000$ ) for all mutation-scaled population sizes ( $\theta$ ) and a  
622 Gamma prior distribution ( $\alpha= 0.002$ ,  $\beta= 0.00001$ ) for all mutation-scaled migration  
623 rate ( $m$ ). The initial parameter value of mutation-scaled divergence times ( $\tau$ ) was first  
624 set individually for each population. Then we ran ~100,000-200,000 iteration tests  
625 and manually evaluated the convergence by checking the achieve acceptance ratios (*ie.*  
626 accept if around 30-70%) or using Tracer v1.6



627 (<http://tree.bio.ed.ac.uk/software/tracer/>). For each test, we updated the input of the  
628 initial  $\tau$  and all fine-tuned parameters based on previous results to get the appropriate  
629 value. The final results in Figure 3 are based on 500,000 MCMC iterations.

630

### 631 **Parameter calibration**

632 We assumed an average generation time ( $g$ ) of 8 years, considering the mutation  
633 rate  $\mu$  (per year) could be variable when using different sequences. The coalescent  
634 time of the *Equus* (4.0-4.5 Mya) (L. Orlando et al., 2013) was used to bound the  
635 parameter  $\mu$ . Effective population sizes ( $N_e$ ) and divergence times ( $T$ ) were estimated  
636 by calibrating  $\theta$  and  $\tau$  parameter using  $g$  and  $\mu$  (Table S6), given by:  $N_e = \theta / (4\mu g)$  and  
637  $T = \tau / \mu$  (Gronau et al., 2011).

638

### 639 **Inferring gene flow**

640 Total migration rates ( $M$ ) were estimated by a mutation-scaled version ( $m$ ) given by:  
641  $M = m\tau_m$ , where  $\tau_m$  is the mutation-scaled time span of the migration band. We then  
642 converted such rates,  $M$ , into a probability of migration using the formula:  $p = 1 - e^{-M}$   
643 (where  $p$  is the probability of gene flow), according to the method presented in  
644 (vonHoldt et al., 2016).

645 The migration model implemented in G-PhoCS makes it possible to detect gene  
646 flow between any two lineages by introducing migration bands manually to the  
647 demographic model. However, it remains difficult to detect weak migration events.  
648 Additionally, scenarios including a large number of migration bands can lead to

649 spurious results. To address this, we first inferred a demographic model with no  
650 migration bands, and then introduced several migration bands corresponding to five  
651 independent scenarios (Table S6). A significant migration band was considered  
652 supported if both the 95% Bayesian credible interval of total migration rate ( $M$ ) did  
653 not include 0 and the mean value of  $M$  was estimated to be greater than 0.03.

654 Settings for the migration bands between extant caballines are based on previous  
655 research (Jonsson et al., 2014). The significant migration band from horse to the  
656 non-caballine ancestor were identified (Table S6), in line with previous work (Jonsson  
657 et al., 2014). However, no other non-negligible ( $M > 3\%$ ) migration bands was found  
658 in our analyses (Table S6).

659 We then tried to estimate the migration events between *E. ovodovi* and other  
660 branches. We added all possible migration bands between *E. ovodovi* and  
661 non-caballine branches into the demographic model except the migration bands  
662 between *E. ovodovi* and the ancestor of non-caballines, as the model is often  
663 underpowered to infer migration between sister populations. All of the migration  
664 bands were separated into four demographic models. Only three migration bands were  
665 shown significant (Table S6).

666 Finally, the total four migration bands were combined into one demographic model  
667 (Table S7) and compared the estimates to the one including no migration (Table S8).

668

## 669 **Demographic trajectories with PSMC**

### 670 **PSMC analyses**

671 In order to reconstruct the past demographic dynamics of the *E. ovodovi* lineage, we  
672 applied the PSMC algorithm (version 0.6.5-r67) (Li & Durbin, 2011) to the sample  
673 HH06D (12.0×), as well as three other Eurasian equine species (*E. caballus* TWI, *E.*  
674 *hemionus* ONA and *E. kiang* KIA).

675 We first obtained the diploid consensus sequences after mapping against the horse  
676 genome for the autosomes of each specimens using bcftools ‘mpileup’ command and  
677 the ‘vcf2fq’ command from vcfutils.pl with the following filters: mapping quality  $\geq$   
678 25; adjust mapping quality =50; minimum depth-of-coverage = 8; maximum  
679 depth-of-coverage  $\leq$  99.5% quantile of the coverage distribution; minimum RMS  
680 mapping quality = 10; filtering window size of indels = 5.

681 After filtering the bases with Phred quality scores strictly lower than 35, we ran  
682 PSMC with following command: ‘psmc -N25 -t15 -r5 -p “4+25\*2+4+6”’. Calibration  
683 was carried out using a generation of 8 years and mutation rate of  $7.242 \times 10^{-9}$  per  
684 generation per site, following previous work (Jonsson et al., 2014). However, as for  
685 the mis-incorporation pattern and high error rate of HH06D (Figure 2—figure  
686 supplements 1 and 2), we also performed analyses without transitions using mutation  
687 rates of  $2.3728 \times 10^{-9}$  that was obtained assuming that the most recent common  
688 ancestor of living equine species emerged 4 Mya (L. Orlando et al., 2013).

689 We found a great expansion of HH06D in the past 50,000 years when retaining  
690 transitions but not when conditioning on transversions (Figure 4—figure supplement  
691 1). The former is thus likely spurious and at least partly driven by severe post-mortem

692 DNA damage signatures in the sequence data. We therefore only used the latter when  
693 considering the ancient HH06D specimen.

694

### 695 **False negative rate correction**

696 The HH06D genome (12.0×) was corrected assuming a uniform false-negative rate  
697 (uFNR) following (L. Orlando et al., 2013), as the average depth-of-coverage is lower  
698 than the recommended 20×. To identify the correction value of uFNR for HH06D, we  
699 randomly down-sampled reads of SOM genome (21.0×) using DownsampleSam  
700 function of Picard Tools to down-scale sequence data to the same average  
701 depth-of-coverage as that obtained for HH06D. This indicated that a value of 0.22 was  
702 the most suitable uFNR value for rescaling the HH06D PSMC profile (Figure  
703 4—figure supplement 2A). The KIA and the ONA genomes, which also showed  
704 limited coverage, were also rescaled following the same procedure (Figure 4—figure  
705 supplement 2B-C). Finally, PSMC confidence intervals were assessed from 100  
706 bootstrap pseudo-replicates (Figure 4).

707

### 708 **Heterozygosity Inference and Inbreeding**

709 Global heterozygosity rates and inbreeding levels were inferred for high coverage  
710 individuals (>10×) using ROHan (Renaud, Hanghoj, Korneliussen, Willerslev, &  
711 Orlando, 2019) with default parameters, except that transitions were excluded  
712 (--tvonly) (Figure 5—figure supplement 1). To limit the impact of remnant  
713 mis-incorporations, we used the attached estimateDamage.pl script to estimate

714 damage for all ancient samples prior to heterozygosity computation. Inbreeding was

715 co-estimated together with genome-wide heterozygosity levels from the total ROH

716 length (Figure 5—figure supplement 2).

717

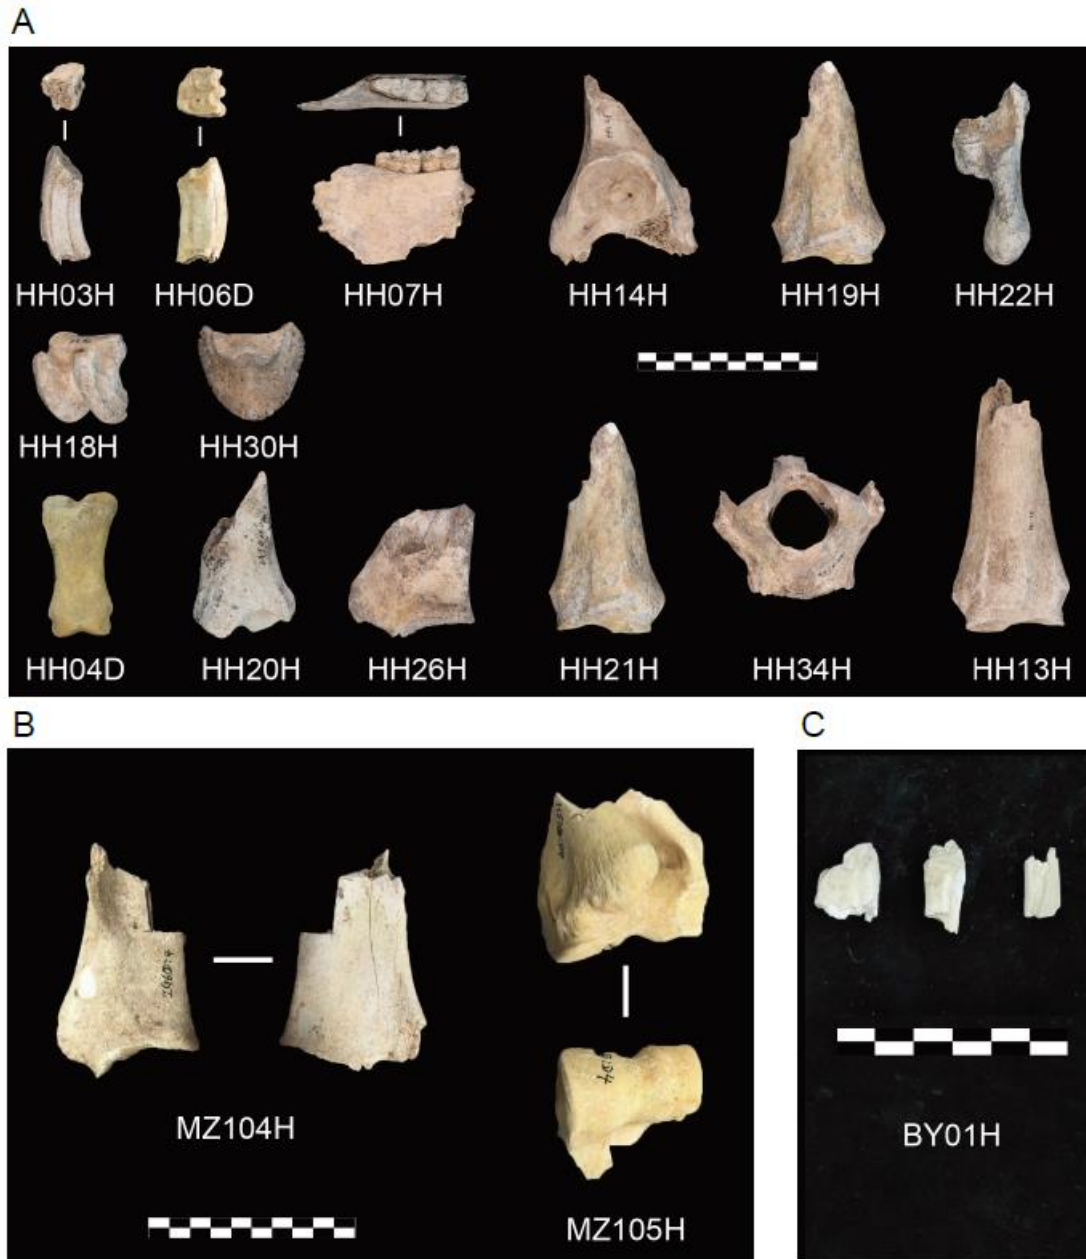

718

719 **Figure 1—figure supplement 1.** Archaeological material investigated in this study.

720 (A) Honghe (HH), (B) Muzhuzhuliang (MZ) and (C) Shatangbeiyuan (BY).

721

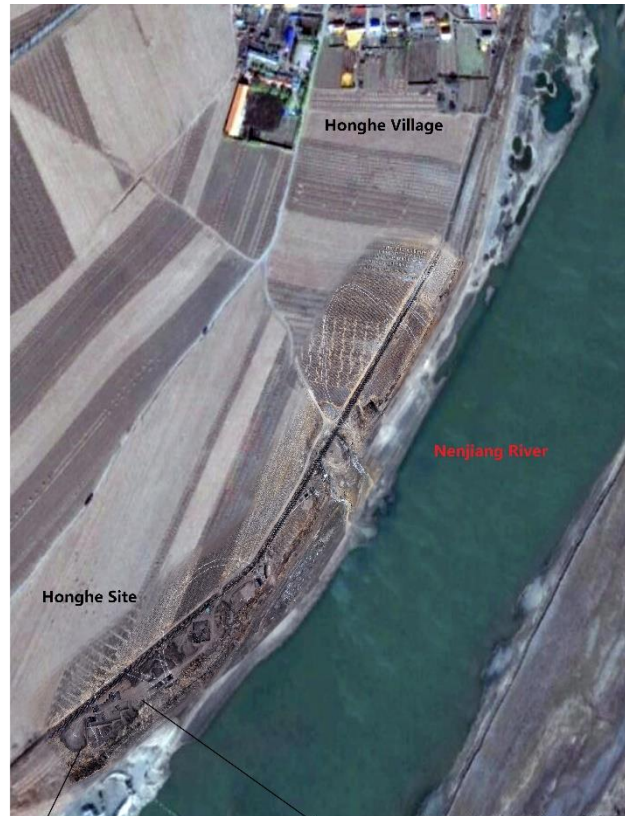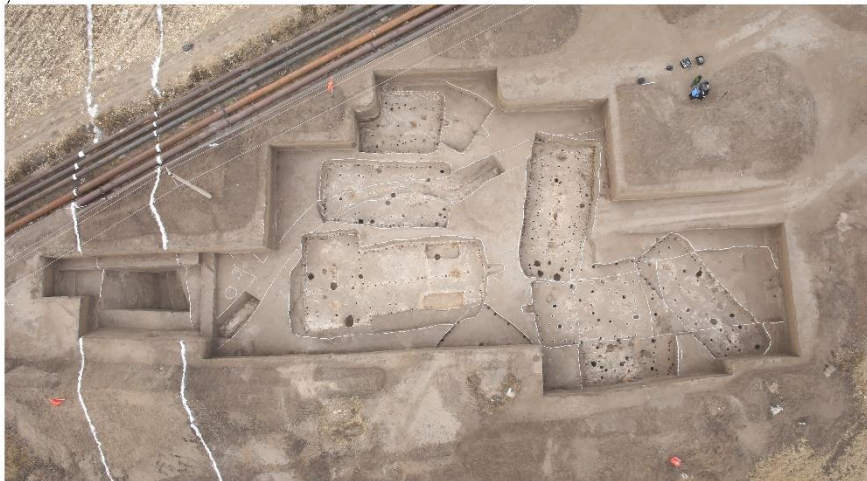

722

723 **Figure 1—figure supplement 2.** Aerial view of the Honghe site.

724

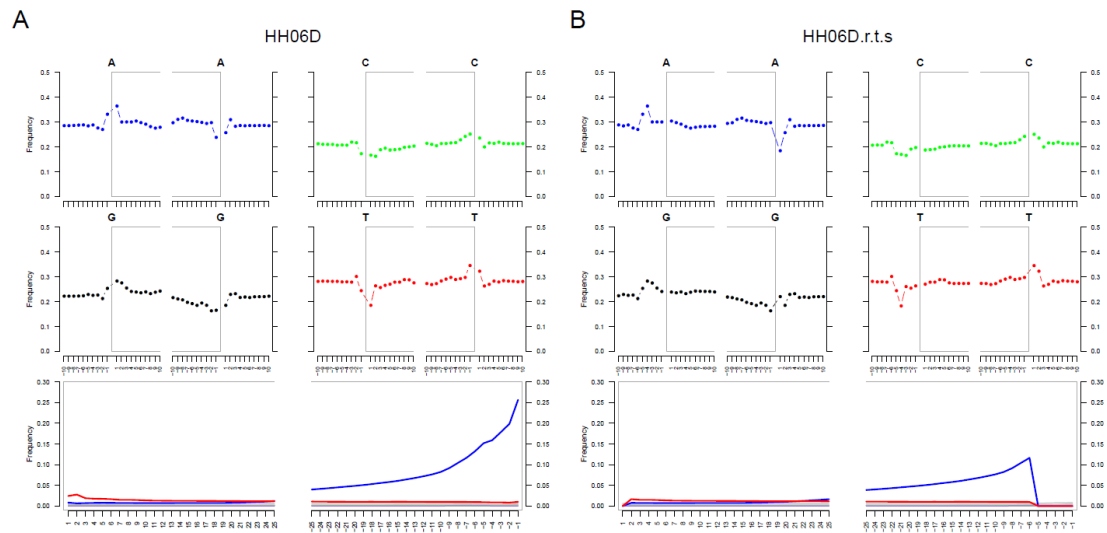

725

726 **Figure 2—figure supplement 1.** DNA Damage patterns for HH06D. (A) Before  
727 rescaling and trimming and (B) after rescaling and trimming the region comprising  
728 the five first and last nucleotides sequenced.

729



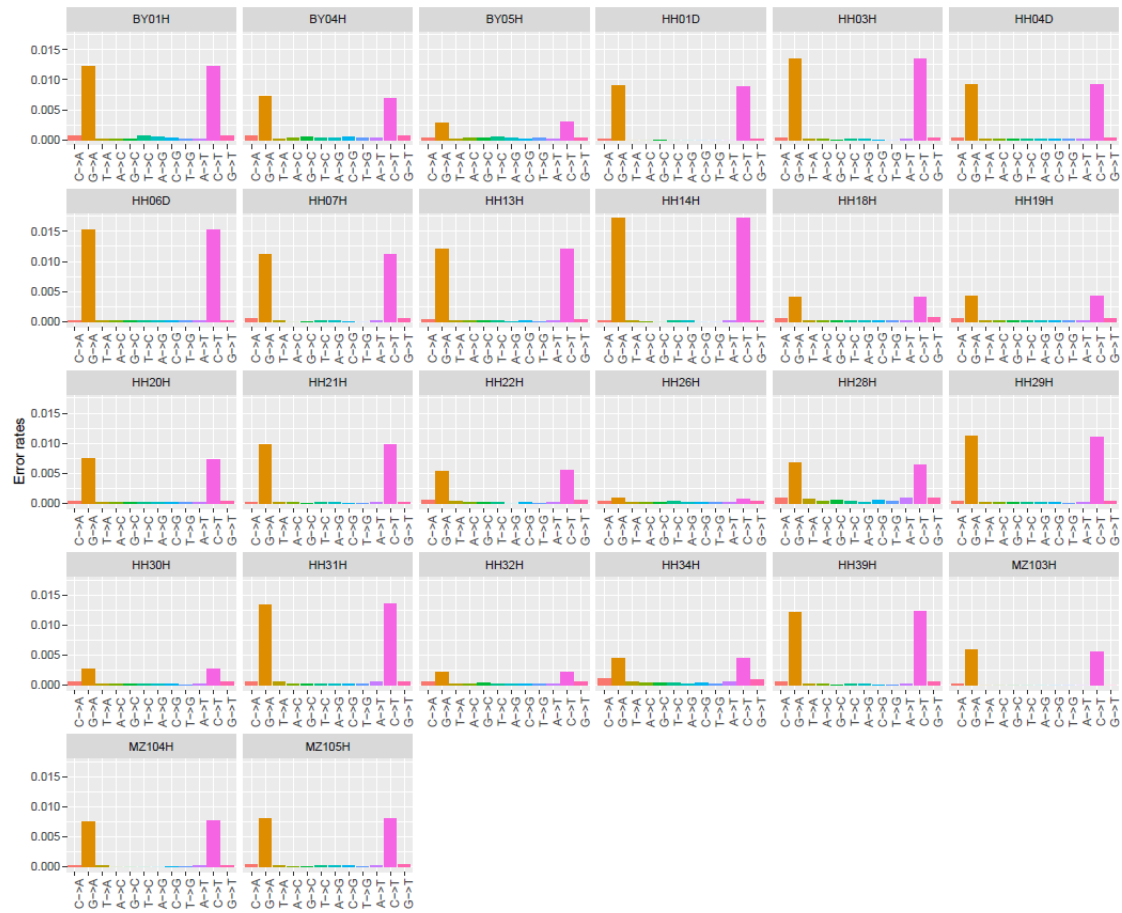

730

731 **Figure 2—figure supplement 2.** Error profiles of the 26 ancient genomes

732 characterized in this study. After trimming and rescaling, reads showing mapping

733 quality scores inferior to 25 and bases showing quality scores inferior to 20 were

734 disregarded.

735

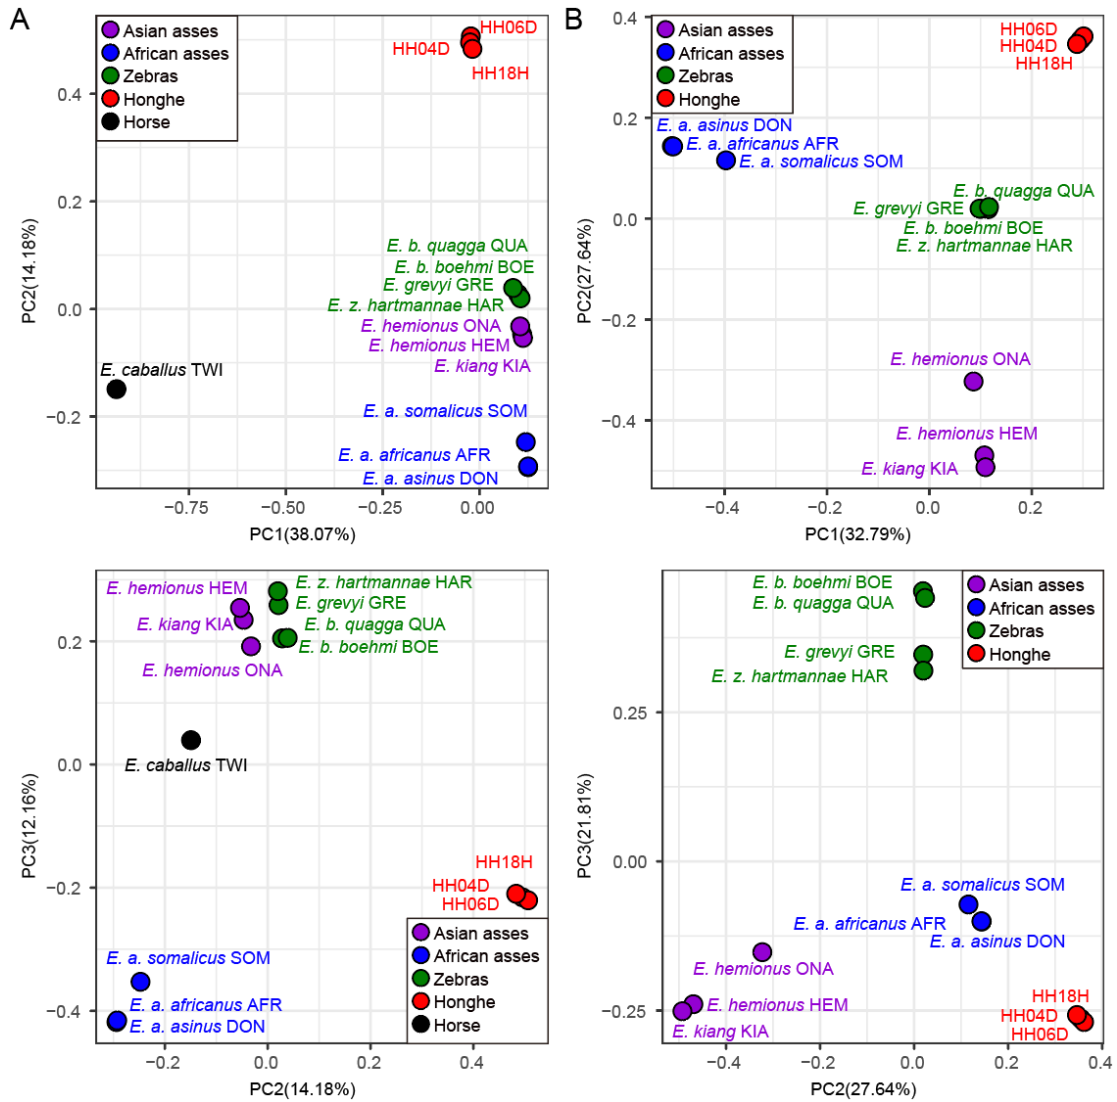

736

737 **Figure 2—figure supplement 3.** Principal Component Analysis (PCA) based on

738 genotype likelihoods using the horse reference genome. **(A)** Including and **(B)**

739 excluding the outgroup individual underlying the horse reference genome (TWI)

740 (Kalbfleisch et al., 2018). Sequence data were aligned against the horse reference

741 genome (Kalbfleisch et al., 2018).

742

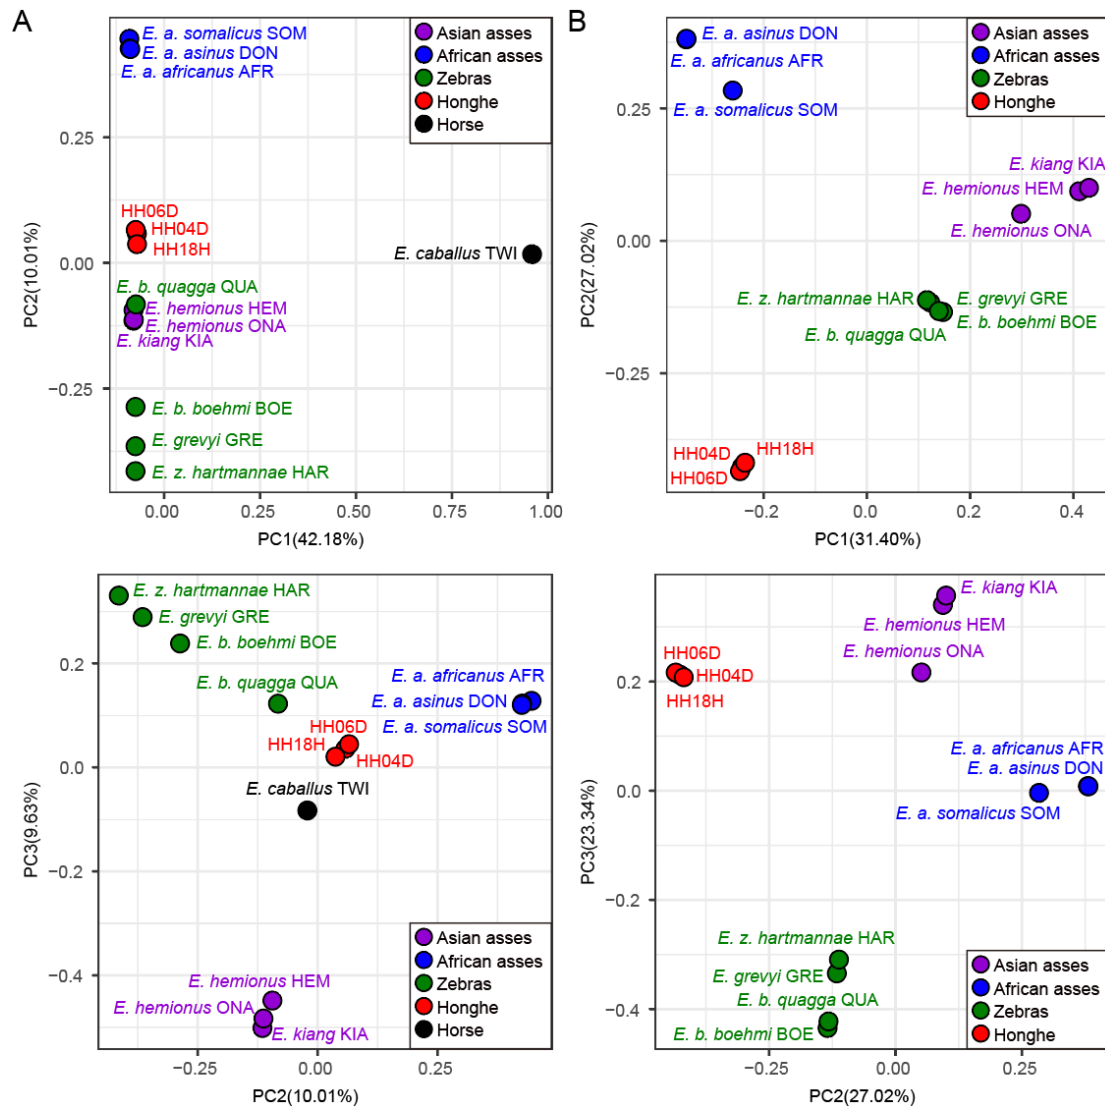

743

744 **Figure 2—figure supplement 4.** Principal Component Analysis (PCA) based on

745 genotype likelihoods using the donkey reference genome. **(A)** Including and **(B)**

746 excluding the outgroup individual underlying the horse reference genome (TWI)

747 (Kalbfleisch et al., 2018). Sequence data were aligned against the donkey reference

748 genome (Renaud et al., 2018).

749

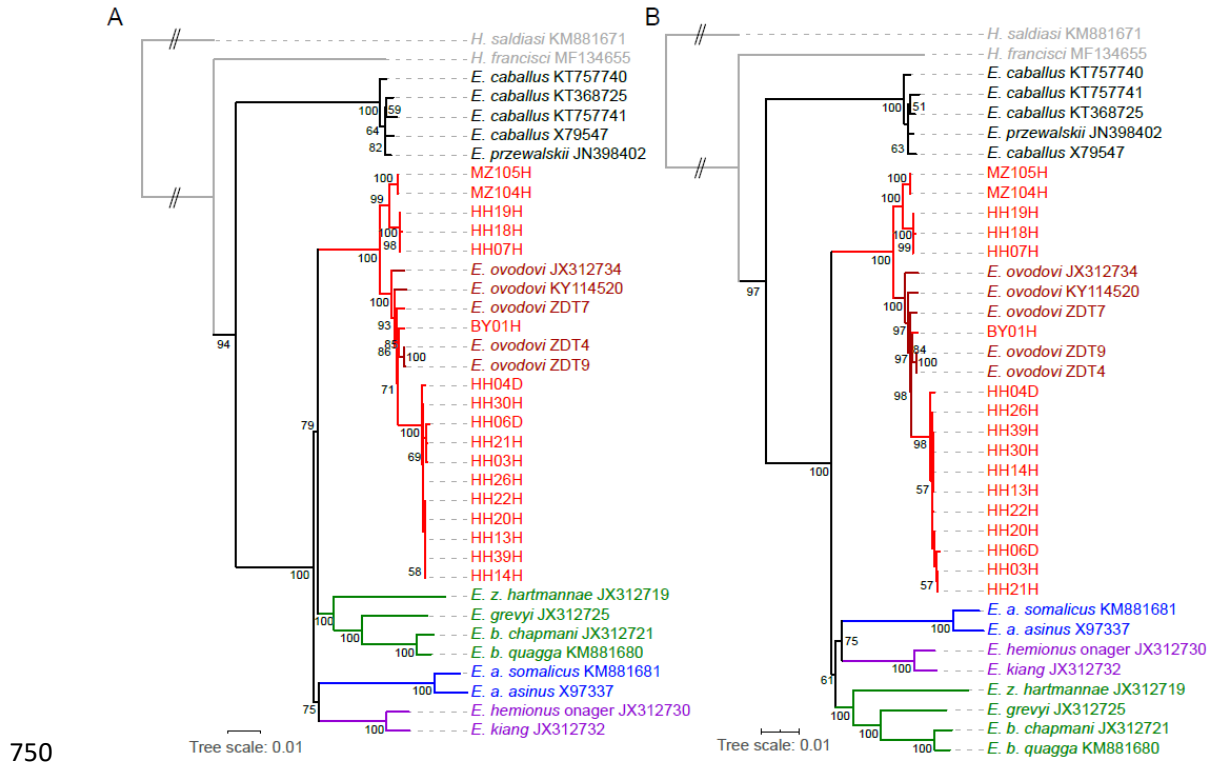

750

751 **Figure 2—figure supplement 5.** RAxML-NG (GTR+GAMMA model) Maximum

752 Likelihood phylogeny of complete mitochondrial sequence data. (A) Including the

753 control region. (B) Excluding the control region. Node support was estimated from

754 1,000 bootstrap pseudo-replicates and the tree was manually rooted using *Hippidion*

755 *Saldiasi*.

756

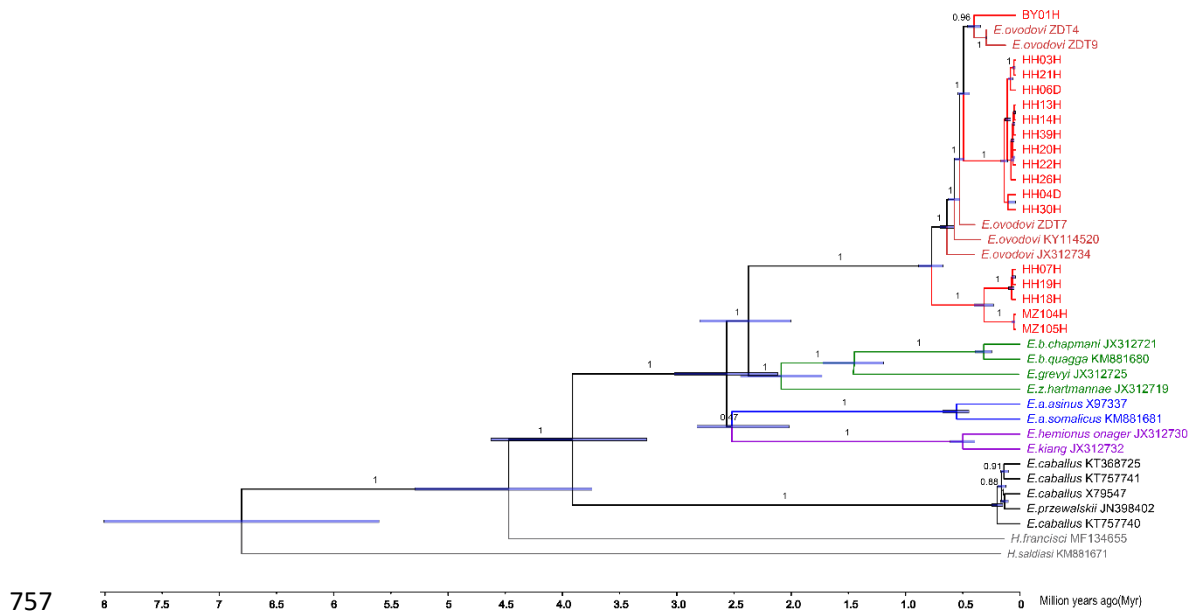

757

758 **Figure 2—figure supplement 6.** Bayesian mitochondrial phylogeny based on 6

759 partitions and using *Hippidion Salsiasi* as outgroup. The tree was reconstructed using

760 a total number of 50 million MCMC states in BEAST (sampling frequency = 1 every

761 10,000, burn-in = 10%). The substitution models applied to the six sequence partitions

762 were the TrN+I+G model (1<sup>st</sup> codon position = 3,802 sites), the TrN+I model (2<sup>nd</sup>

763 codon position = 3,799 sites), the GTR+I+G model (3<sup>rd</sup> codon position = 3,799 sites),

764 the HKY+I model (transfer RNAs = 1,517 sites), the TrN+I+G model (ribosomal

765 RNAs = 2,556 sites) and the HKY+I+G model (control region = 1,192 sites).

766

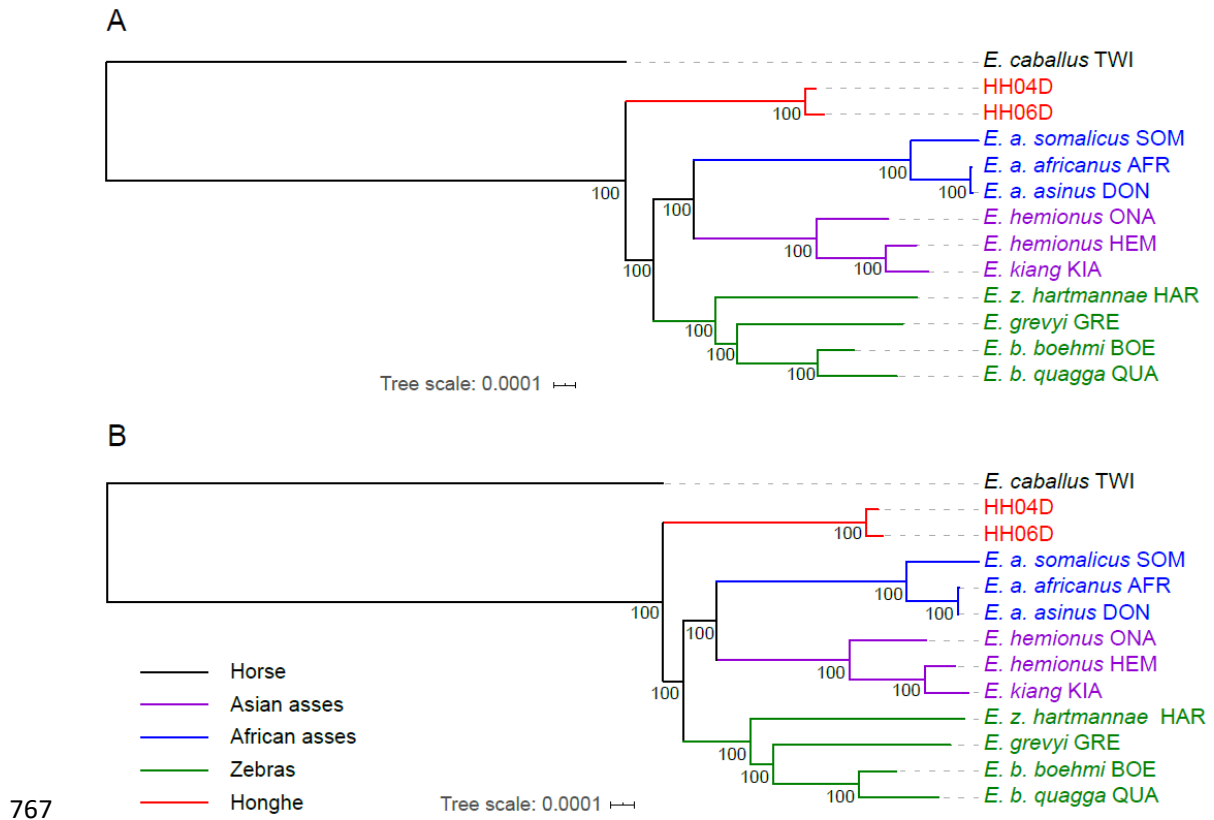

767

768 **Figure 2—figure supplement 7.** Exome-based Maximum likelihood phylogeny

769 rooted by the horse lineage. **(A)** Using sequence alignments against the horse

770 reference genome (Kalbfleisch et al., 2018). **(B)** Using sequence alignments against

771 the donkey reference genome (Renaud et al., 2018). Node supports were estimated

772 from 100 bootstrap pseudo-replicates.

773

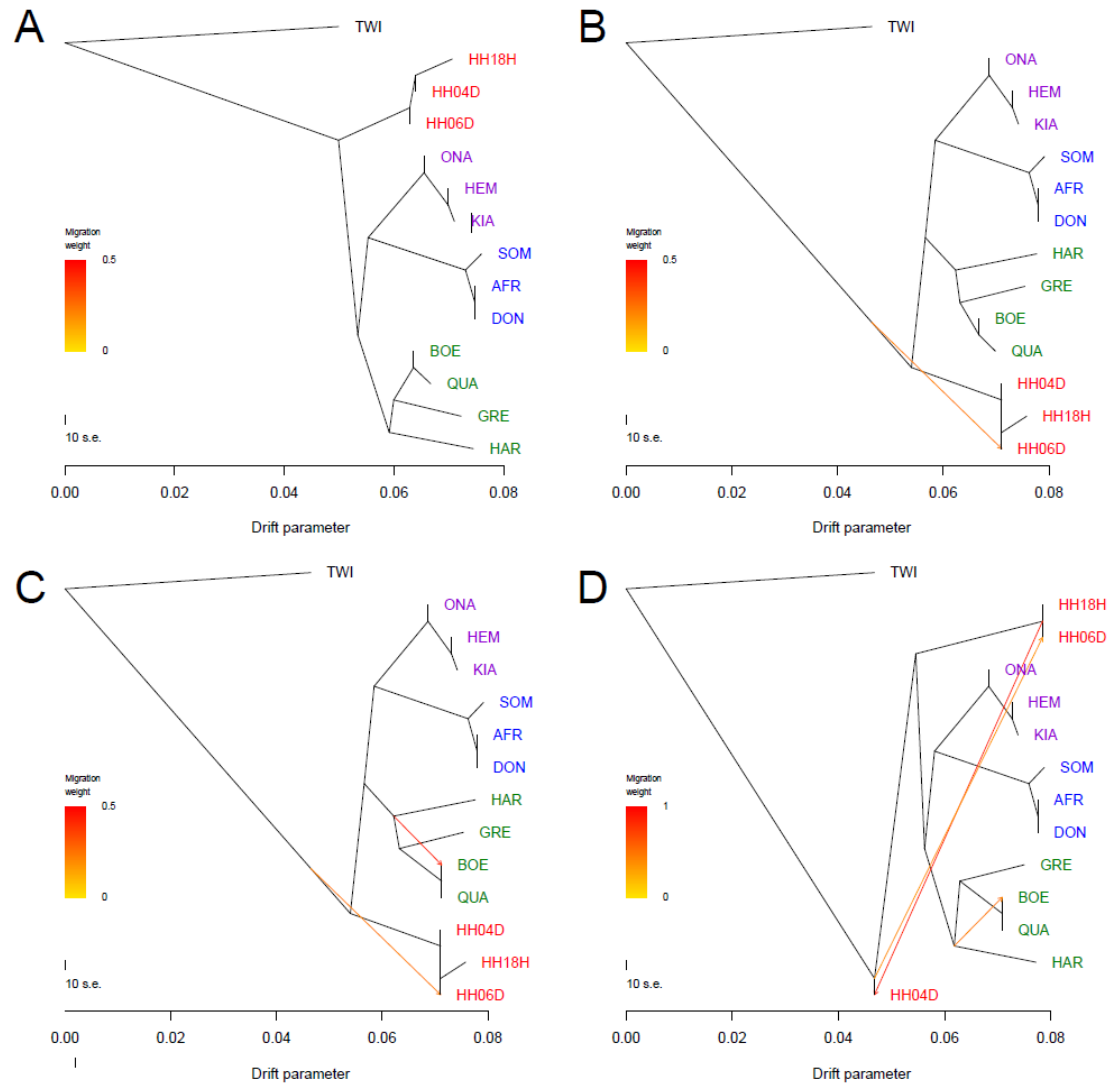

774

775 **Figure 2—figure supplement 8.** Treemix analysis of based on genome-wide SNP

776 data conditioned on transversions using the horse reference genome. Sequence data

777 were mapped against the horse reference genome (Kalbfleisch et al., 2018). A total of

778 0 to 3 migration edges were considered. The result of each analysis is shown in panels

779 (A) to (D), respectively. Considering additional migration edges did not improve the

780 variance explained by the TreeMix model (Table S5).

781

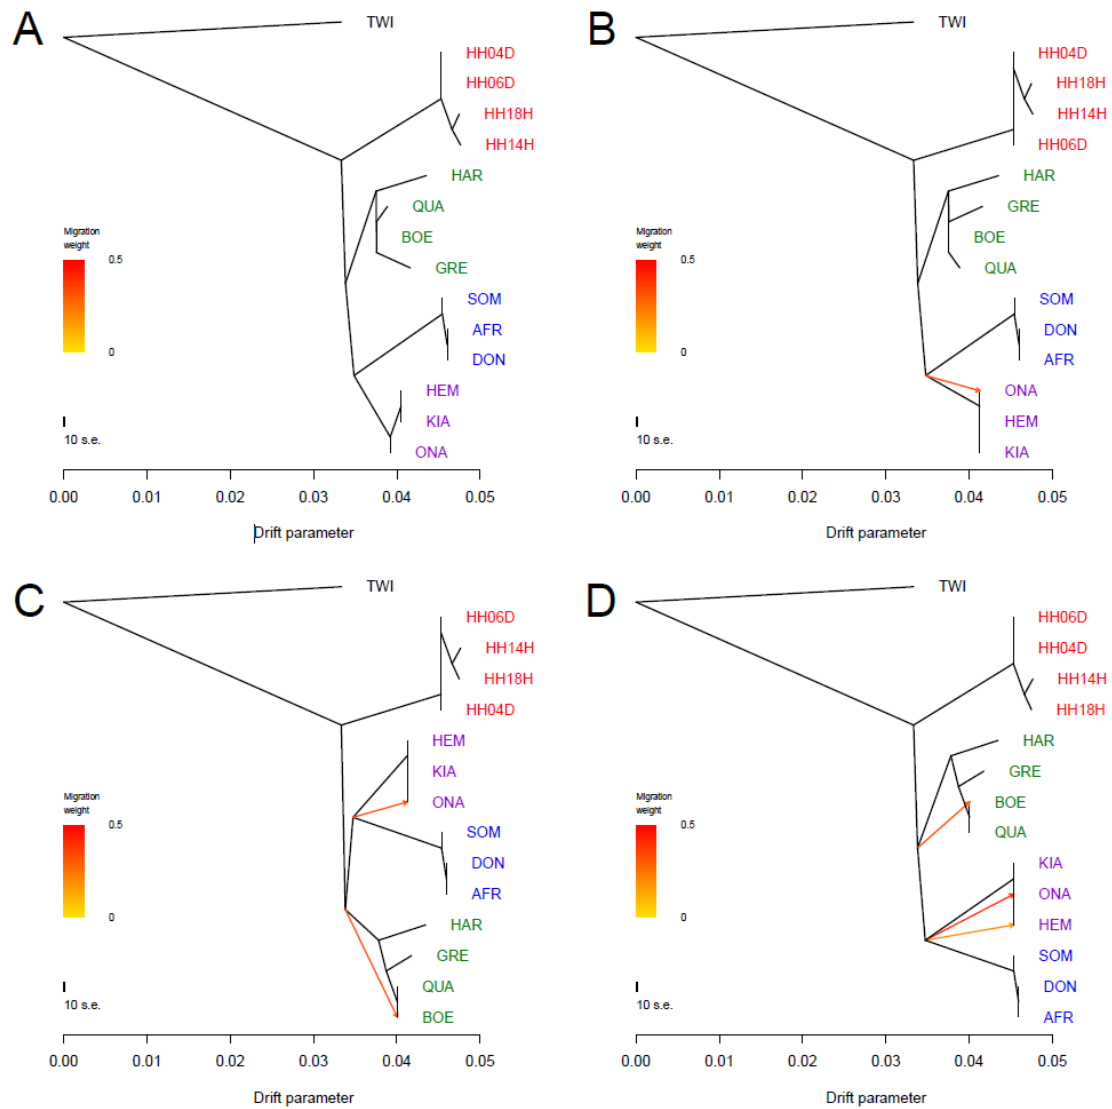

782

783 **Figure 2—figure supplement 9.** Treemix analysis of based on genome-wide SNP

784 data conditioned on transversions using the donkey reference genome. Sequence data

785 were mapped against the donkey reference genome (Renaud et al., 2018). A total of 0

786 to 3 migration edges were considered. The result of each analysis is shown in panels

787 (A) to (D), respectively. Considering additional migration edges did not improve the

788 variance explained by the TreeMix model (Table S5).

789



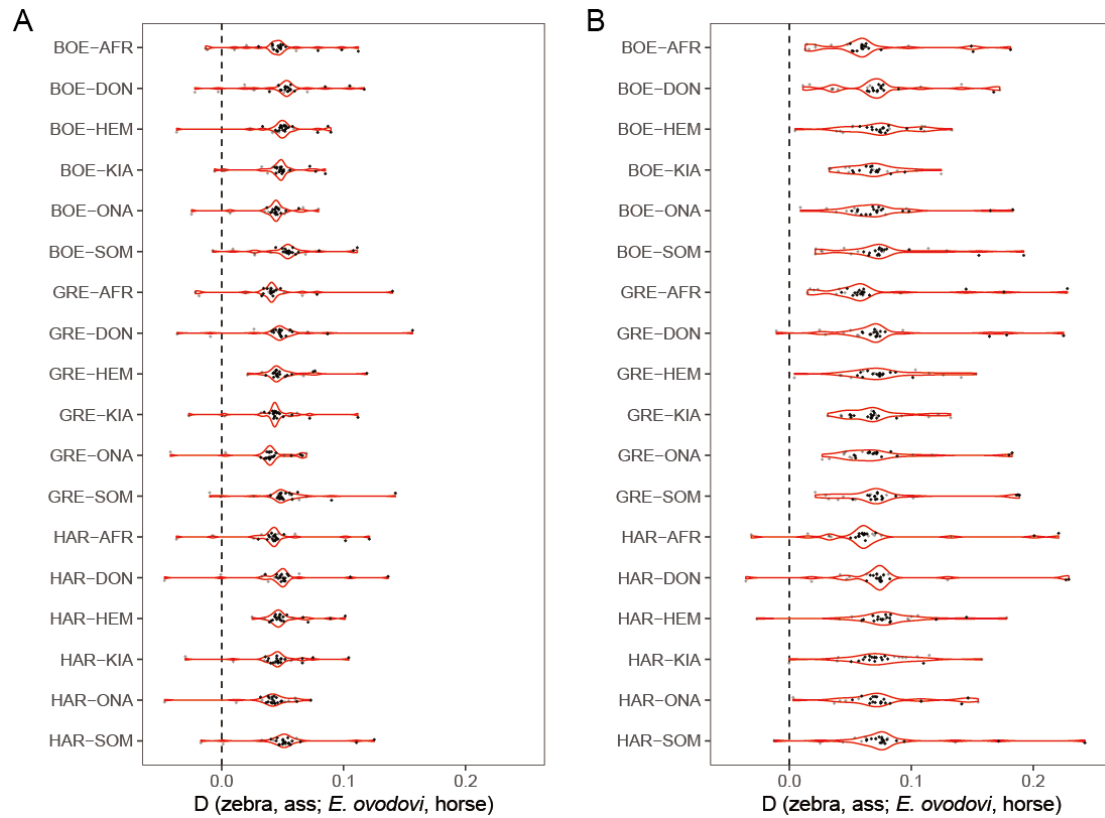

790

791 **Figure 3—figure supplement 1.** *D*-statistics in the form of (zebra, ass; *E. ovodovi*,

792 outgroup), using sequence alignments against the horse reference genome.

793 Significantly positive *D*-statistics are indicative of an excess of shared derived

794 polymorphisms between *E. (Sussemionus) ovodovi* and extant assess, which is

795 compatible with admixture between both lineages. **(A)** Including transitions. **(B)**

796 Excluding transitions.

797

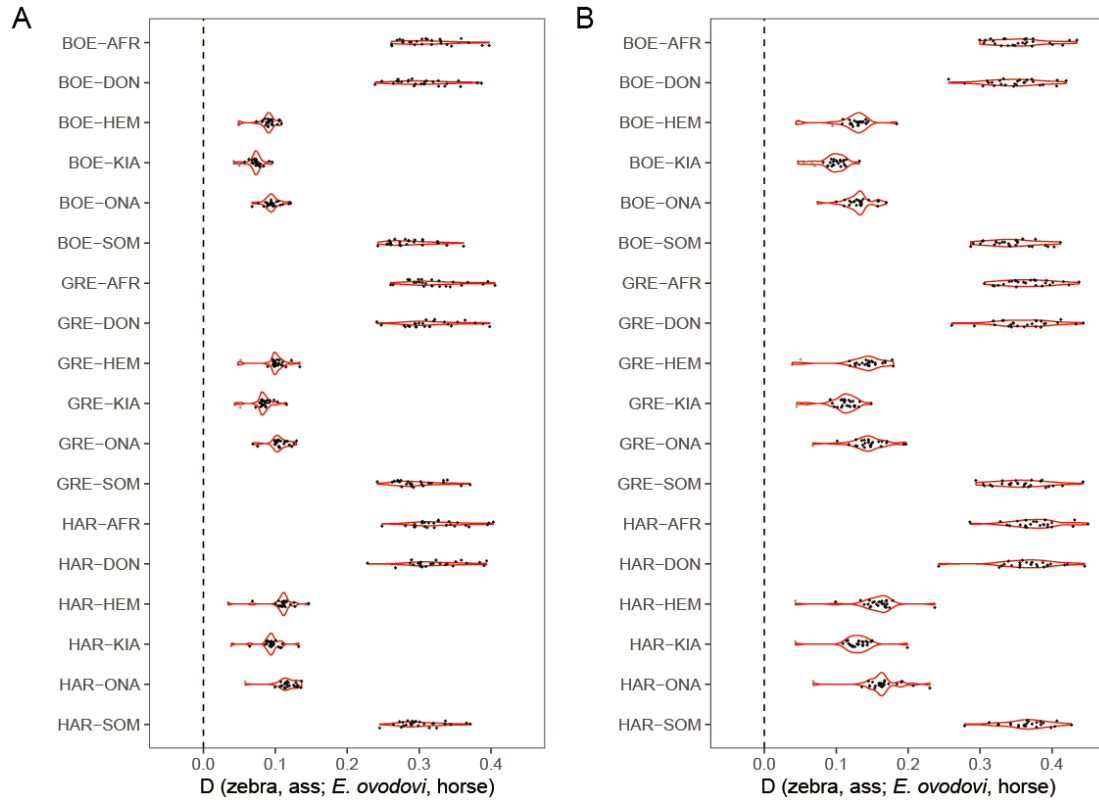

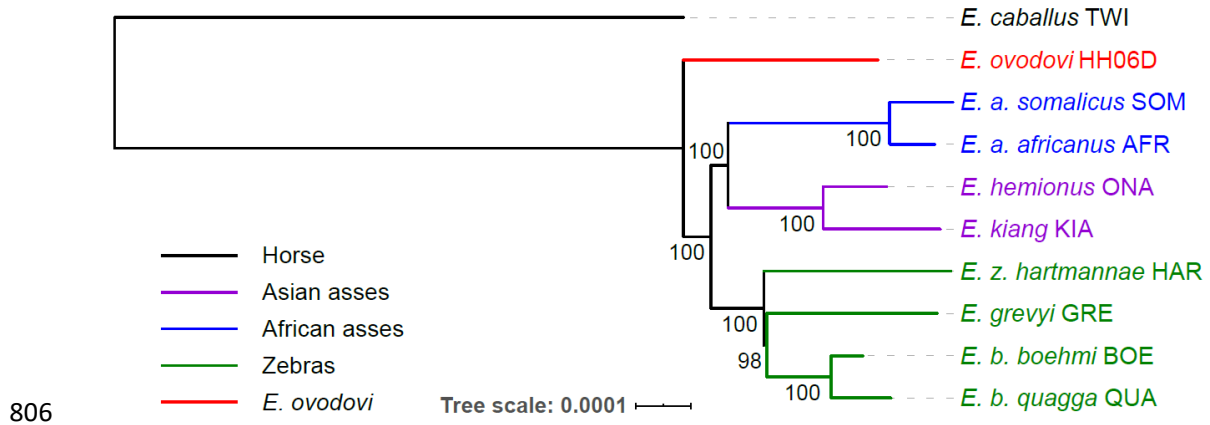

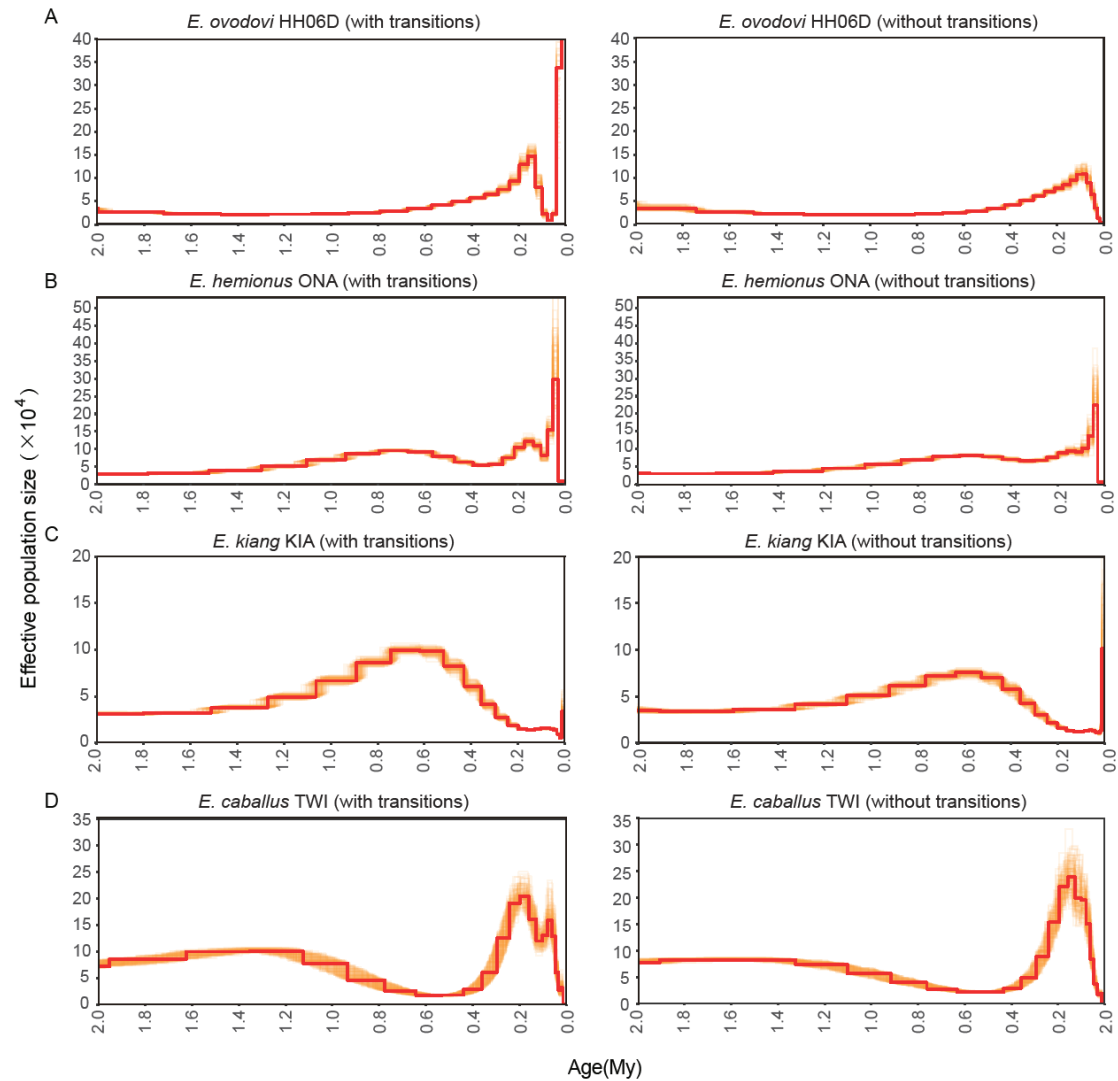

812

813 **Figure 4—figure supplement 1.** PSMC bootstrap pseudo-replicates for samples with  
814 (left) and without (right) transitions. **(A)** HH06D, **(B)** ONA, **(C)** KIA and **(D)** TWI.

815 The *E. ovodovi* genome still included, even after rescaling, a significant proportion of  
816 nucleotide mis-incorporations pertaining to post-mortem DNA damage. This resulted  
817 in the presence of an excessive fraction of singleton mutations along this lineage, and  
818 the artefactual expansion observed in the most recent time range.

819

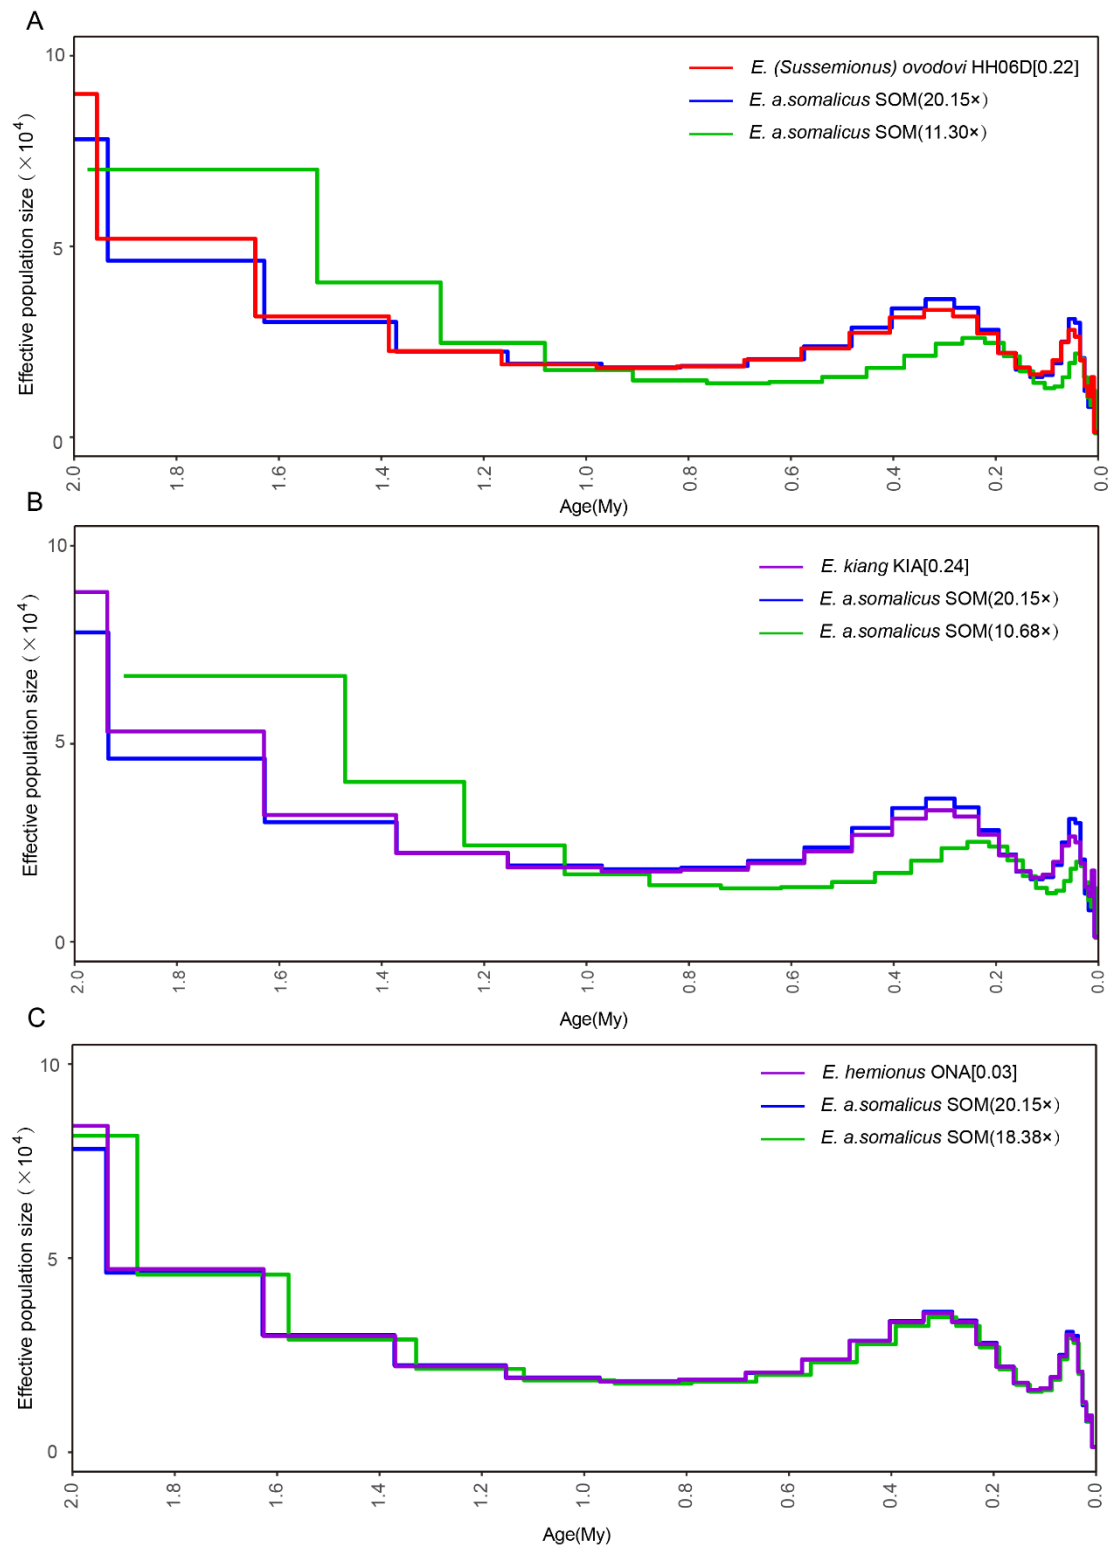

820

821 **Figure 4—figure supplement 2.** Determining the uniform false-negative rate (uFNR)

822 that was necessary for PSMC scaling. (A) HH06D (11.30 $\times$ ), (B) KIA (10.68 $\times$ ) and

823 (C) ONA (18.38 $\times$ ).

824

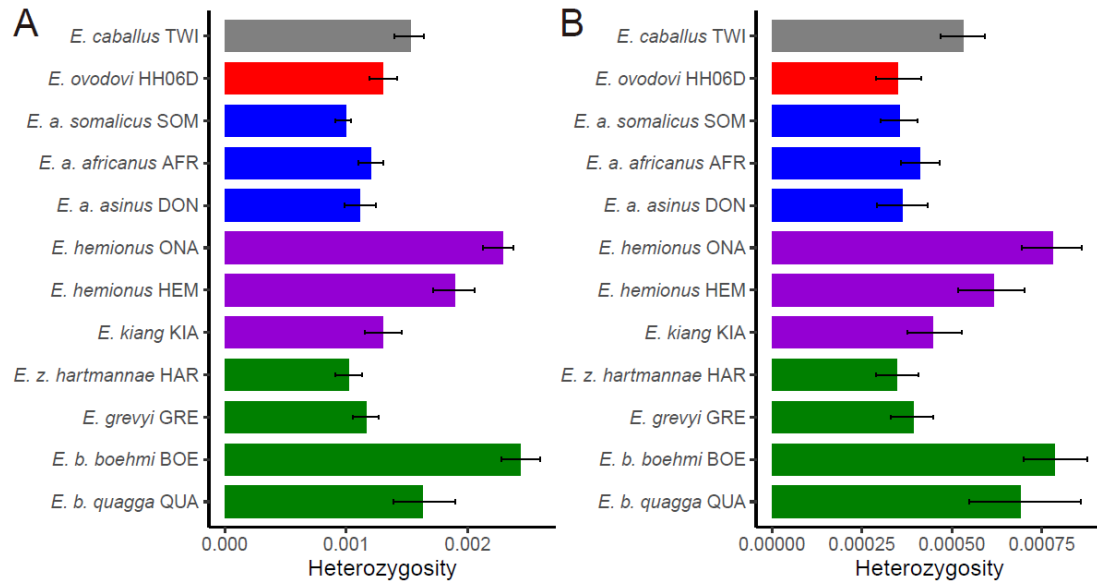

825

826 **Figure 5—figure supplement 1.** Heterozygosity rates outside Runs-of-Homozygosity

827 (ROH) together with 95% confidence intervals. **(A)** Including transitions and **(B)**

828 excluding transitions.

829

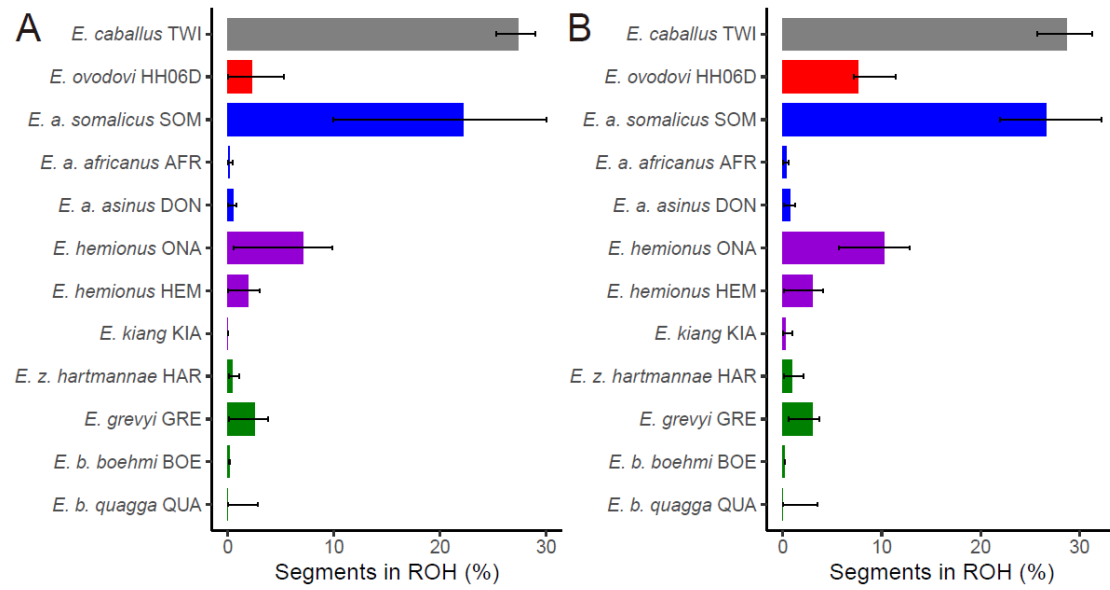

830

831 **Figure 5—figure supplement 2.** The fraction of the genome segments consisting of

832 ROHs together with 95% confidence intervals. **(A)** Including transitions and **(B)**

833 excluding transitions.

834

## 835 **References**

- 836 Bouckaert, R., Vaughan, T. G., Barido-Sottani, J., Duchene, S., Fourment, M., Gavryushkina, A., Heled, J.,  
837 Jones, G., Kuhnert, D., De Maio, N., Matschiner, M., Mendes, F. K., Muller, N. F., Ogilvie, H. A.,  
838 du Plessis, L., Poppinga, A., Rambaut, A., Rasmussen, D., Siveroni, I., Suchard, M. A., Wu, C. H.,  
839 Xie, D., Zhang, C., Stadler, T., & Drummond, A. J. (2019). BEAST 2.5: An advanced software  
840 platform for Bayesian evolutionary analysis. *PLoS Comput Biol*, *15*(4), e1006650.  
841 doi:10.1371/journal.pcbi.1006650
- 842 Briggs, Adrian W., Stenzel, Udo, Johnson, Philip L. F., Green, Richard E., Kelso, Janet, Prüfer, Kay, Meyer,  
843 Matthias, Krause, Johannes, Ronan, Michael T., Lachmann, Michael, & Pääbo, Svante. (2007).  
844 Patterns of damage in genomic DNA sequences from a Neandertal. *Proceedings of the*  
845 *National Academy of Sciences*, *104*(37), 14616-14621. doi:10.1073/pnas.0704665104
- 846 Clark, Peter U., Dyke, Arthur S., Shakun, Jeremy D., Carlson, Anders E., Clark, Jorie, Wohlfarth, Barbara,  
847 Mitrovica, Jerry X., Hostetler, Steven W., & McCabe, A. Marshall. (2009). The Last Glacial  
848 Maximum. *Science*, *325*(5941), 710-714. doi:10.1126/science.1172873
- 849 Dawei, Cai, Lu, Han, Chengzhi, Xie, Shengnan, Li, Hui, Zhou, & Hong, Zhu. (2007). Mitochondrial DNA  
850 analysis of Bronze Age horses recovered from Chifeng region, Inner Mongolia, China. *Progress*  
851 *in Natural Science*.
- 852 Der Sarkissian, C., Vilstrup, J. T., Schubert, M., Seguin-Orlando, A., Eme, D., Weinstock, J., Alberdi, M. T.,  
853 Martin, F., Lopez, P. M., Prado, J. L., Prieto, A., Douady, C. J., Stafford, T. W., Willerslev, E., &  
854 Orlando, L. (2015). Mitochondrial genomes reveal the extinct Hippidion as an outgroup to all  
855 living equids. *Biol Lett*, *11*(3). doi:10.1098/rsbl.2014.1058



- 856 Drummond, A. J., & Rambaut, A. (2007). BEAST: Bayesian evolutionary analysis by sampling trees. *BMC*  
857 *Evol Biol*, 7, 214. doi:10.1186/1471-2148-7-214
- 858 Druzhkova, Anna S., Makunin, Alexey I., Vorobieva, Nadezhda V., Vasiliev, Sergey K., Ovodov, Nikolai D.,  
859 Shunkov, Mikhail V., Trifonov, Vladimir A., & Graphodatsky, Alexander S. (2017). Complete  
860 mitochondrial genome of an extinct Equus (Sussemionus) ovodovi specimen from Denisova  
861 cave (Altai, Russia). *Mitochondrial DNA Part B*, 2(1), 79-81.  
862 doi:10.1080/23802359.2017.1285209
- 863 Edgar, R. C. (2004). MUSCLE: multiple sequence alignment with high accuracy and high throughput.  
864 *Nucleic Acids Res*, 32(5), 1792-1797. doi:10.1093/nar/gkh340
- 865 Eisenmann, V. (2010). Sussemionus, a new subgenus of Equus (Perissodactyla, Mammalia). *C R Biol*,  
866 333(3), 235-240. doi:10.1016/j.crv.2009.12.013
- 867 Fages, Antoine, Hanghøj, Kristian, Khan, Naveed, Gaunitz, Charleen, Seguin-Orlando, Andaine,  
868 Leonardi, Michela, McCrory Constantz, Christian, Gamba, Cristina, Al-Rasheid, Khaled A. S.,  
869 Albizuri, Silvia, Alfarhan, Ahmed H., Allentoft, Morten, Alquraishi, Saleh, Anthony, David,  
870 Baimukhanov, Nurbol, Barrett, James H., Bayarsaikhan, Jamsranjav, Benecke, Norbert,  
871 Bernáldez-Sánchez, Eloísa, Berrocal-Rangel, Luis, Biglari, Fereidoun, Boessenkool, Sanne,  
872 Boldgiv, Bazartseren, Brem, Gottfried, Brown, Dorcas, Burger, Joachim, Crubézy, Eric,  
873 Daugnora, Linas, Davoudi, Hossein, de Barros Damgaard, Peter, de los Ángeles de Chorro y de  
874 Villa-Ceballos, María, Deschler-Erb, Sabine, Detry, Cleia, Dill, Nadine, do Mar Oom, Maria,  
875 Dohr, Anna, Ellingvåg, Sturla, Erdenebaatar, Diimaajav, Fathi, Homa, Felkel, Sabine,  
876 Fernández-Rodríguez, Carlos, García-Viñas, Esteban, Germonpré, Mietje, Granado, José D.,  
877 Hallsson, Jón H., Hemmer, Helmut, Hofreiter, Michael, Kasparov, Aleksei, Khasanov, Mutalib,

- 878 Khazaeli, Roya, Kosintsev, Pavel, Kristiansen, Kristian, Kubatbek, Tabaldiev, Kuderna, Lukas,  
879 Kuznetsov, Pavel, Laleh, Haeedeh, Leonard, Jennifer A., Lhuillier, Johanna, Liesau von  
880 Lettow-Vorbeck, Corina, Logvin, Andrey, Lõugas, Lembi, Ludwig, Arne, Luis, Cristina, Arruda,  
881 Ana Margarida, Marques-Bonet, Tomas, Matoso Silva, Raquel, Merz, Victor, Mijiddorj,  
882 Enkhbayar, Miller, Bryan K., Mochlov, Oleg, Mohaseb, Fatemeh A., Morales, Arturo,  
883 Nieto-Espinet, Ariadna, Nistelberger, Heidi, Onar, Vedat, Pálsdóttir, Albína H., Pitulko, Vladimir,  
884 Pitskhelauri, Konstantin, Pruvost, Mélanie, Rajic Sikanjic, Petra, Rapan Papeša, Anita,  
885 Roslyakova, Natalia, Sardari, Alireza, Sauer, Eberhard, Schafberg, Renate, Scheu, Amelie,  
886 Schibler, Jörg, Schlumbaum, Angela, Serrand, Nathalie, Serres-Armero, Aitor, Shapiro, Beth,  
887 Sheikhi Seno, Shiva, Shevnina, Irina, Shidrang, Sonia, Southon, John, Star, Bastiaan, Sykes,  
888 Naomi, Taheri, Kamal, Taylor, William, Teegen, Wolf-Rüdiger, Trbojević Vukičević, Tajana, Trixl,  
889 Simon, Tumen, Dashzeveg, Undrakhbold, Sainbileg, Usmanova, Emma, Vahdati, Ali,  
890 Valenzuela-Lamas, Silvia, Viegas, Catarina, Wallner, Barbara, Weinstock, Jaco, Zaibert, Victor,  
891 Clavel, Benoit, Lepetz, Sébastien, Mashkour, Marjan, Helgason, Agnar, Stefánsson, Kári, Barrey,  
892 Eric, Willerslev, Eske, Outram, Alan K., Librado, Pablo, & Orlando, Ludovic. (2019). Tracking  
893 Five Millennia of Horse Management with Extensive Ancient Genome Time Series. *Cell*.  
894 doi:<https://doi.org/10.1016/j.cell.2019.03.049>  
895 Gaunitz, C., Fages, A., Hanghoj, K., Albrechtsen, A., Khan, N., Schubert, M., Seguin-Orlando, A., Owens,  
896 I. J., Felkel, S., Bignon-Lau, O., de Barros Damgaard, P., Mittnik, A., Mohaseb, A. F., Davoudi, H.,  
897 Alquraishi, S., Alfarhan, A. H., Al-Rasheid, K. A. S., Crubezy, E., Benecke, N., Olsen, S., Brown,  
898 D., Anthony, D., Massy, K., Pitulko, V., Kasparov, A., Brem, G., Hofreiter, M., Mukhtarova, G.,  
899 Baimukhanov, N., Lougas, L., Onar, V., Stockhammer, P. W., Krause, J., Boldgiv, B., Undrakhbold,

900 S., Erdenebaatar, D., Lepetz, S., Mashkour, M., Ludwig, A., Wallner, B., Merz, V., Merz, I.,  
901 Zaibert, V., Willerslev, E., Librado, P., Outram, A. K., & Orlando, L. (2018). Ancient genomes  
902 revisit the ancestry of domestic and Przewalski's horses. *Science*, *360*(6384), 111-114.  
903 doi:10.1126/science.aao3297

904 Gronau, I., Hubisz, M. J., Gulko, B., Danko, C. G., & Siepel, A. (2011). Bayesian inference of ancient  
905 human demography from individual genome sequences. *Nat Genet*, *43*(10), 1031-1034.  
906 doi:10.1038/ng.937

907 Heintzman, P. D., Zazula, G. D., MacPhee, R., Scott, E., Cahill, J. A., McHorse, B. K., Kapp, J. D., Stiller, M.,  
908 Wooller, M. J., Orlando, L., Southon, J., Froese, D. G., & Shapiro, B. (2017). A new genus of  
909 horse from Pleistocene North America. *Elife*, *6*. doi:10.7554/eLife.29944

910 Henn, Brenna M., Cavalli-Sforza, L. L., & Feldman, Marcus W. (2012). The great human expansion.  
911 *Proceedings of the National Academy of Sciences*, *109*(44), 17758-17764.  
912 doi:10.1073/pnas.1212380109

913 Huang, J., Zhao, Y., Bai, D., Shiraigol, W., Li, B., Yang, L., Wu, J., Bao, W., Ren, X., Jin, B., Zhao, Q., Li, A.,  
914 Bao, S., Bao, W., Xing, Z., An, A., Gao, Y., Wei, R., Bao, Y., Bao, T., Han, H., Bai, H., Bao, Y., Zhang,  
915 Y., Daidiikhuu, D., Zhao, W., Liu, S., Ding, J., Ye, W., Ding, F., Sun, Z., Shi, Y., Zhang, Y., Meng, H.,  
916 & Dugarjaviin, M. (2015). Donkey genome and insight into the imprinting of fast karyotype  
917 evolution. *Sci Rep*, *5*, 14106. doi:10.1038/srep14106

918 Jonsson, H., Ginolhac, A., Schubert, M., Johnson, P. L., & Orlando, L. (2013). mapDamage2.0: fast  
919 approximate Bayesian estimates of ancient DNA damage parameters. *Bioinformatics*, *29*(13),  
920 1682-1684. doi:10.1093/bioinformatics/btt193

- 921 Jonsson, H., Schubert, M., Seguin-Orlando, A., Ginolhac, A., Petersen, L., Fumagalli, M., Albrechtsen, A.,  
922 Petersen, B., Korneliusson, T. S., Vilstrup, J. T., Lear, T., Myka, J. L., Lundquist, J., Miller, D. C.,  
923 Alfarhan, A. H., Alquraishi, S. A., Al-Rasheid, K. A., Stagegaard, J., Strauss, G., Bertelsen, M. F.,  
924 Sicheritz-Ponten, T., Antczak, D. F., Bailey, E., Nielsen, R., Willerslev, E., & Orlando, L. (2014).  
925 Speciation with gene flow in equids despite extensive chromosomal plasticity. *Proc Natl Acad*  
926 *Sci U S A*, *111*(52), 18655-18660. doi:10.1073/pnas.1412627111
- 927 Kalbfleisch, Theodore S., Rice, Edward S., DePriest, Michael S., Walenz, Brian P., Hestand, Matthew S.,  
928 Vermeesch, Joris R., O'Connell, Brendan L., Fiddes, Ian T., Vershinina, Alisa O., Saremi,  
929 Nedda F., Petersen, Jessica L., Finno, Carrie J., Bellone, Rebecca R., McCue, Molly E., Brooks,  
930 Samantha A., Bailey, Ernest, Orlando, Ludovic, Green, Richard E., Miller, Donald C., Antczak,  
931 Douglas F., & MacLeod, James N. (2018). Improved reference genome for the domestic horse  
932 increases assembly contiguity and composition. *Communications Biology*, *1*(1), 197.  
933 doi:10.1038/s42003-018-0199-z
- 934 Keane, Thomas M., Creevey, Christopher J., Pentony, Melissa M., Naughton, Thomas J., & McLnerney,  
935 James O. (2006). Assessment of methods for amino acid matrix selection and their use on  
936 empirical data shows that ad hoc assumptions for choice of matrix are not justified. *BMC*  
937 *Evolutionary Biology*, *6*(1), 29. doi:10.1186/1471-2148-6-29
- 938 Khenzykhenova, Fedora I, Shchetnikov, Alexander A, Sato, Takao, Erbajeva, Margarita A, Semenei,  
939 Elena Y, Lipnina, Ekaterina A, Yoshida, Kunio, Kato, Hirofumi, Filinov, Ivan I, & Tumurov, Erdem  
940 G. (2016). Ecosystem analysis of Baikal Siberia using Palaeolithic faunal assemblages to  
941 reconstruct MIS 3-MIS 2 environments and climate. *Quaternary international*, *425*, 16-27.

- 942 Korneliussen, Thorfinn Sand, Albrechtsen, Anders, & Nielsen, Rasmus. (2014). ANGSD: Analysis of Next  
943 Generation Sequencing Data. *BMC Bioinformatics*, 15(1), 356.  
944 doi:10.1186/s12859-014-0356-4
- 945 Kozlov, A. M., Darriba, D., Flouri, T., Morel, B., & Stamatakis, A. (2019). RAXML-NG: A fast, scalable, and  
946 user-friendly tool for maximum likelihood phylogenetic inference. *Bioinformatics*.  
947 doi:10.1093/bioinformatics/btz305
- 948 Kozlov, Alexey M., Aberer, Andre J., & Stamatakis, Alexandros. (2015). ExaML version 3: a tool for  
949 phylogenomic analyses on supercomputers. *Bioinformatics*, 31(15), 2577-2579.  
950 doi:10.1093/bioinformatics/btv184 %J Bioinformatics
- 951 Letunic, I, & Bork, P. (2016). Interactive tree of life (iTOL) v3: an online tool for the display and  
952 annotation of phylogenetic and other trees. *Nucleic Acids Research*, 44(Web Server issue),  
953 W242-W245.
- 954 Li, H., & Durbin, R. (2009). Fast and accurate short read alignment with Burrows-Wheeler transform.  
955 *Bioinformatics*, 25(14), 1754-1760. doi:10.1093/bioinformatics/btp324
- 956 Li, H., & Durbin, R. (2011). Inference of human population history from individual whole-genome  
957 sequences. *Nature*, 475(7357), 493-496. doi:10.1038/nature10231
- 958 Li, H., Handsaker, B., Wysoker, A., Fennell, T., Ruan, J., Homer, N., Marth, G., Abecasis, G., & Durbin, R.  
959 (2009). The Sequence Alignment/Map format and SAMtools. *Bioinformatics*, 25(16),  
960 2078-2079. doi:10.1093/bioinformatics/btp352
- 961 Librado, Pablo, & Orlando, Ludovic. (2020). Genomics and the Evolutionary History of Equids. *Annual*  
962 *Review of Animal Biosciences*. doi:10.1146/annurev-animal-061220-023118

- 963 Lindsay, Everett H., Opdyke, Neil D., & Johnson, Noye M. (1980). Pliocene dispersal of the horse *Equus*  
964 and late Cenozoic mammalian dispersal events. *Nature*, 287(5778), 135-138.
- 965 Malikov, Dmitriy G. (2016). The large mammals of North-Minusinsk basin in the Last Glacial period.  
966 *Quaternary international*, 420, 208-220. doi:10.1016/j.quaint.2015.10.055
- 967 McKenna, A., Hanna, M., Banks, E., Sivachenko, A., Cibulskis, K., Kernytsky, A., Garimella, K., Altshuler,  
968 D., Gabriel, S., Daly, M., & DePristo, M. A. (2010). The Genome Analysis Toolkit: a MapReduce  
969 framework for analyzing next-generation DNA sequencing data. *Genome Res*, 20(9),  
970 1297-1303. doi:10.1101/gr.107524.110
- 971 Meisner, Jonas, & Albrechtsen, Anders. (2018). Inferring Population Structure and Admixture  
972 Proportions in Low-Depth NGS Data. *Genetics*, 210(2), 719-731.  
973 doi:10.1534/genetics.118.301336
- 974 Orlando, L., Ginolhac, A., Zhang, G., Froese, D., Albrechtsen, A., Stiller, M., Schubert, M., Cappellini, E.,  
975 Petersen, B., Moltke, I., Johnson, P. L., Fumagalli, M., Vilstrup, J. T., Raghavan, M.,  
976 Korneliusen, T., Malaspina, A. S., Vogt, J., Szklarczyk, D., Kelstrup, C. D., Vinther, J., Dolocan,  
977 A., Stenderup, J., Velazquez, A. M., Cahill, J., Rasmussen, M., Wang, X., Min, J., Zazula, G. D.,  
978 Seguin-Orlando, A., Mortensen, C., Magnussen, K., Thompson, J. F., Weinstock, J., Gregersen,  
979 K., Roed, K. H., Eisenmann, V., Rubin, C. J., Miller, D. C., Antczak, D. F., Bertelsen, M. F., Brunak,  
980 S., Al-Rasheid, K. A., Ryder, O., Andersson, L., Mundy, J., Krogh, A., Gilbert, M. T., Kjaer, K.,  
981 Sicheritz-Ponten, T., Jensen, L. J., Olsen, J. V., Hofreiter, M., Nielsen, R., Shapiro, B., Wang, J., &  
982 Willerslev, E. (2013). Recalibrating *Equus* evolution using the genome sequence of an early  
983 Middle Pleistocene horse. *Nature*, 499(7456), 74-78. doi:10.1038/nature12323

- 984 Orlando, L., Metcalf, J. L., Alberdi, M. T., Telles-Antunes, M., Bonjean, D., Otte, M., Martin, F.,  
985 Eisenmann, V., Mashkour, M., Morello, F., Prado, J. L., Salas-Gismondi, R., Shockey, B. J., Wrinn,  
986 P. J., Vasil'ev, S. K., Ovodov, N. D., Cherry, M. I., Hopwood, B., Male, D., Austin, J. J., Hanni, C.,  
987 & Cooper, A. (2009). Revising the recent evolutionary history of equids using ancient DNA.  
988 *Proc Natl Acad Sci U S A*, 106(51), 21754-21759. doi:10.1073/pnas.0903672106
- 989 Orlando, Ludovic. (2020). The Evolutionary and Historical Foundation of the Modern Horse: Lessons  
990 from Ancient Genomics. *Annual Review of Genetics*, 54(1), 563-581.  
991 doi:10.1146/annurev-genet-021920-011805
- 992 Outram, A. K., Stear, N. A., Bendrey, R., Olsen, S., Kasparov, A., Zaibert, V., Thorpe, N., & Evershed, R. P.  
993 (2009). The earliest horse harnessing and milking. *Science*, 323(5919), 1332-1335.  
994 doi:10.1126/science.1168594
- 995 Palkopoulou, Eleftheria, Mallick, Swapan, Skoglund, Pontus, Enk, Jacob, Rohland, Nadin, Li, Heng,  
996 Omrak, Ayça, Vartanyan, Sergey, Poinar, Hendrik, Götherström, Anders, Reich, David, & Dalén,  
997 Love. (2015). Complete Genomes Reveal Signatures of Demographic and Genetic Declines in  
998 the Woolly Mammoth. *Current Biology*, 25(10), 1395-1400.  
999 doi:<https://doi.org/10.1016/j.cub.2015.04.007>
- 1000 Pickrell, Joseph K., & Pritchard, Jonathan K. (2012). Inference of Population Splits and Mixtures from  
1001 Genome-Wide Allele Frequency Data. *PLOS Genetics*, 8(11), e1002967.  
1002 doi:10.1371/journal.pgen.1002967
- 1003 Plasteeva, Natalya A. (2015). Equus (*Sussemionus*) *ovodovi* Eisenmann et Vasiliev, 2011 from the Late  
1004 Pleistocene of Western Siberia. *Russian Journal of Theriology*, 14(2), 187-200.

- 1005 Renaud, G., Hanghoj, K., Korneliussen, T. S., Willerslev, E., & Orlando, L. (2019). Joint Estimates of  
1006 Heterozygosity and Runs of Homozygosity for Modern and Ancient Samples. *Genetics*.  
1007 doi:10.1534/genetics.119.302057
- 1008 Renaud, G., Petersen, B., Seguin-Orlando, A., Bertelsen, M. F., Waller, A., Newton, R., Paillot, R., Bryant,  
1009 N., Vaudin, M., Librado, P., & Orlando, L. (2018). Improved de novo genomic assembly for the  
1010 domestic donkey. *Sci Adv*, 4(4), eaaq0392. doi:10.1126/sciadv.aaq0392
- 1011 Rossel, Stine, Marshall, Fiona, Peters, Joris, Pilgram, Tom, Adams, Matthew D., & O'Connor, David.  
1012 (2008). Domestication of the donkey: Timing, processes, and indicators. *Proc Natl Acad Sci U*  
1013 *S A*, 105(10), 3715-3720. doi:10.1073/pnas.0709692105 %J Proceedings of the National  
1014 Academy of Sciences
- 1015 Schubert, M., Ermini, L., Der Sarkissian, C., Jonsson, H., Ginolhac, A., Schaefer, R., Martin, M. D.,  
1016 Fernandez, R., Kircher, M., McCue, M., Willerslev, E., & Orlando, L. (2014). Characterization of  
1017 ancient and modern genomes by SNP detection and phylogenomic and metagenomic analysis  
1018 using PALEOMIX. *Nat Protoc*, 9(5), 1056-1082. doi:10.1038/nprot.2014.063
- 1019 Schubert, M., Ginolhac, A., Lindgreen, S., Thompson, J. F., Al-Rasheid, K. A., Willerslev, E., Krogh, A., &  
1020 Orlando, L. (2012). Improving ancient DNA read mapping against modern reference genomes.  
1021 *BMC Genomics*, 13, 178. doi:10.1186/1471-2164-13-178
- 1022 Schubert, M., Jonsson, H., Chang, D., Der Sarkissian, C., Ermini, L., Ginolhac, A., Albrechtsen, A.,  
1023 Dupanloup, I., Foucal, A., Petersen, B., Fumagalli, M., Raghavan, M., Seguin-Orlando, A.,  
1024 Korneliussen, T. S., Velazquez, A. M., Stenderup, J., Hoover, C. A., Rubin, C. J., Alfarhan, A. H.,  
1025 Alquraishi, S. A., Al-Rasheid, K. A., MacHugh, D. E., Kalbfleisch, T., MacLeod, J. N., Rubin, E. M.,  
1026 Sicheritz-Ponten, T., Andersson, L., Hofreiter, M., Marques-Bonet, T., Gilbert, M. T., Nielsen, R.,



- 1027 Excoffier, L., Willerslev, E., Shapiro, B., & Orlando, L. (2014). Prehistoric genomes reveal the  
1028 genetic foundation and cost of horse domestication. *Proc Natl Acad Sci U S A*, *111*(52),  
1029 E5661-5669. doi:10.1073/pnas.1416991111
- 1030 Schubert, M., Lindgreen, S., & Orlando, L. (2016). AdapterRemoval v2: rapid adapter trimming,  
1031 identification, and read merging. *BMC Res Notes*, *9*, 88. doi:10.1186/s13104-016-1900-2
- 1032 Seguin-Orlando, A., Gamba, C., Sarkissian, C., Ermini, L., Louvel, G., Boulygina, E., Sokolov, A.,  
1033 Nedoluzhko, A., Lorenzen, E. D., Lopez, P., McDonald, H. G., Scott, E., Tikhonov, A., Stafford, T.  
1034 W., Jr., Alfarhan, A. H., Alquraishi, S. A., Al-Rasheid, K. A. S., Shapiro, B., Willerslev, E.,  
1035 Prokhortchouk, E., & Orlando, L. (2015). Pros and cons of methylation-based enrichment  
1036 methods for ancient DNA. *Sci Rep*, *5*, 11826. doi:10.1038/srep11826
- 1037 Shchetnikov, A. A., Klementiev, A. M., Filinov, I. A., & Semenev, E. Yu. (2015). Large mammals from the  
1038 Upper Neopleistocene reference sections in the Tunka rift valley, southwestern Baikal Region.  
1039 *Stratigraphy and Geological Correlation*, *23*(2), 214-236. doi:10.1134/s0869593815020057
- 1040 Shunkov, M.V. (2018). The Denisova cave – everything changes, but nothing disappears. *Science First*  
1041 *Hand.*
- 1042 Soraggi, Samuele, Wiuf, Carsten, & Albrechtsen, Anders. (2018). Powerful Inference with the  
1043 D-Statistic on Low-Coverage Whole-Genome Data. *G3: Genes/Genomes/Genetics*, *8*(2),  
1044 551-566. doi:10.1534/g3.117.300192
- 1045 Stamatakis, Alexandros. (2014). RAxML version 8: a tool for phylogenetic analysis and post-analysis of  
1046 large phylogenies. *Bioinformatics*, *30*(9), 1312.

- 1047 Vasiliev, S. K. (2013). Large Mammal Fauna from the Pleistocene Deposits of Chagyrskaya Cave  
1048 Northwestern Altai (based on 2007–2011 Excavations). *Archaeology, Ethnology and*  
1049 *Anthropology of Eurasia*, 41(1), 28-44. doi:<https://doi.org/10.1016/j.aee.2013.07.003>
- 1050 Vilstrup, J. T., Seguin-Orlando, A., Stiller, M., Ginolhac, A., Raghavan, M., Nielsen, S. C., Weinstock, J.,  
1051 Froese, D., Vasiliev, S. K., Ovodov, N. D., Clary, J., Helgen, K. M., Fleischer, R. C., Cooper, A.,  
1052 Shapiro, B., & Orlando, L. (2013). Mitochondrial phylogenomics of modern and ancient  
1053 equids. *PLoS One*, 8(2), e55950. doi:10.1371/journal.pone.0055950
- 1054 vonHoldt, Bridgett M., Cahill, James A., Fan, Zhenxin, Gronau, Ilan, Robinson, Jacqueline, Pollinger,  
1055 John P., Shapiro, Beth, Wall, Jeff, & Wayne, Robert K. (2016). Whole-genome sequence  
1056 analysis shows that two endemic species of North American wolf are admixtures of the  
1057 coyote and gray wolf. *Sci Adv*, 2(7), e1501714. doi:10.1126/sciadv.1501714
- 1058 Yang, Dongya Y., Eng, Barry, Wayne, John S., Dudar, J. Christopher, & Saunders, Shelley R. (1998).  
1059 Improved DNA extraction from ancient bones using silica-based spin columns. *American*  
1060 *Journal of Physical Anthropology*, 105(4), 539-543.  
1061 doi:10.1002/(sici)1096-8644(199804)105:4<539::Aid-ajpa10>3.0.Co;2-1
- 1062 Yuan, Jun-Xia, Hou, Xin-Dong, Barlow, Axel, Preick, Michaela, Taron, Ulrike H., Alberti, Federica, Basler,  
1063 Nikolas, Deng, Tao, Lai, Xu-Long, Hofreiter, Michael, & Sheng, Gui-Lian. (2019). Molecular  
1064 identification of late and terminal Pleistocene *Equus ovodovi* from northeastern China. *PLoS*  
1065 *One*, 14(5), e0216883. doi:10.1371/journal.pone.0216883
- 1066
